# Supplementary material for: A new approach to 10-arylated 5H-dibenzo[b,f]azepines using syn-selective hydrohalogenation of ethynylaniline
Source: Royal Society of Chemistry journal article supplement (doi:10.1039/d2ob00950a), 2022-01-01

## Supporting Information

### **A new approach to 10-arylated 5*H*-dibenzo[*b,f*]azepines using *syn*-selective hydrohalogenation of ethynylaniline**

Kento Iwai,<sup>a,b</sup> Yusuke Mukaijo,<sup>a</sup> Haruyasu Asahara,<sup>\*a,b,c</sup> and Nagatoshi Nishiwaki <sup>\*a,b</sup>

- a) School of Environmental Science and Engineering, Kochi University of Technology, Tosayamada, Kami, Kochi 782-8502, Japan  
b) Research Center for Molecular Design, Kochi University of Technology, Tosayamada, Kami, Kochi 782-8502, Japan  
c) Graduate School of Pharmaceutical Sciences, Osaka University, Yamadaoka 1-6, Suita, Osaka 565-0871, Japan  
Email: nishiwaki.nagatoshi@kochi-tech.ac.jp  
Fax: +81 887 57 2520; Tel: +81 887 57 2517

## Table of contents

|                                                                    |          |
|--------------------------------------------------------------------|----------|
| <b>1. Crystallographic data for compounds 5, 9a, and 10a</b> ..... | <b>2</b> |
| <b>2. Temperature-variable NMR spectra of 10a</b> .....            | <b>3</b> |
| <b>3. Pd-catalyzed intramolecular cyclization of 2b</b> .....      | <b>4</b> |
| <b>3. Copies of NMR spectra</b> .....                              | <b>5</b> |

Crystallographic data for compounds **5**, **9a**, and **10**

|                                                                       | 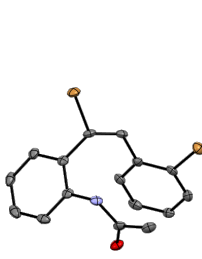                                                                              |                       |                      |
|-----------------------------------------------------------------------|----------------------------------------------------------------------------------------------------------------------------------------------------------------|---------------------------------------------------------------------------------------------------------|---------------------------------------------------------------------------------------------------------|
|                                                                       | <b>5</b>                                                                                                                                                       | <b>9a</b>                                                                                               | <b>10</b>                                                                                               |
| <b>Empirical formula</b>                                              | C <sub>16</sub> H <sub>13</sub> Br <sub>2</sub> NO                                                                                                             | C <sub>23</sub> H <sub>20</sub> BrNO                                                                    | C <sub>23</sub> H <sub>19</sub> NO                                                                      |
| <b>Formula weight</b>                                                 | 395.07                                                                                                                                                         | 406.31                                                                                                  | 325.39                                                                                                  |
| <b>Temperature (K)</b>                                                | 93(2)                                                                                                                                                          | 93(2)                                                                                                   | 93(2)                                                                                                   |
| <b>Crystal system</b>                                                 | triclinic                                                                                                                                                      | monoclinic                                                                                              | monoclinic                                                                                              |
| <b>Space group</b>                                                    | <i>P</i> -1 (#2)                                                                                                                                               | <i>P</i> 2 <sub>1</sub> / <i>c</i> (#14)                                                                | <i>P</i> 2 <sub>1</sub> / <i>c</i> (#14)                                                                |
| <b>Unit cell Dimensions</b>                                           | <i>a</i> = 9.9894(2) Å,<br><i>b</i> = 11.4609(3) Å,<br><i>c</i> = 14.7673(4) Å,<br>$\alpha$ = 106.052(2)°,<br>$\beta$ = 102.529(2)°,<br>$\gamma$ = 106.772(2)° | <i>a</i> = 8.3390(3) Å,<br><i>b</i> = 10.6181(3) Å,<br><i>c</i> = 21.0722(6) Å,<br>$\beta$ = 92.485(3)° | <i>a</i> = 15.5398(5) Å,<br><i>b</i> = 8.6572(2) Å,<br><i>c</i> = 13.0504(4) Å,<br>$\beta$ = 99.779(3)° |
| <b>Volume (Å<sup>3</sup>)</b>                                         | 1472.53(7)                                                                                                                                                     | 1864.07(10)                                                                                             | 1730.18(9)                                                                                              |
| <b>Z</b>                                                              | 4                                                                                                                                                              | 4                                                                                                       | 4                                                                                                       |
| <b><math>\rho_{\text{calc}}</math> (g•cm<sup>-3</sup>)</b>            | 1.782                                                                                                                                                          | 1.448                                                                                                   | 1.249                                                                                                   |
| <b>Absorption coefficient (mm<sup>-1</sup>)</b>                       | 5.499                                                                                                                                                          | 2.216                                                                                                   | 0.076                                                                                                   |
| <b><math>\theta</math> range (°)</b>                                  | 2.02 to 29.44                                                                                                                                                  | 2.445 to 25.500                                                                                         | 2.642 to 30.134                                                                                         |
| <b>Reflections collected</b>                                          | 5481                                                                                                                                                           | 3460                                                                                                    | 3219                                                                                                    |
| <b>Independent reflections</b>                                        | 4651                                                                                                                                                           | 3085                                                                                                    | 2766                                                                                                    |
| <b>Completeness to <math>\theta</math></b>                            | 100                                                                                                                                                            | 99.9                                                                                                    | 100                                                                                                     |
| <b>Goodness-of-fit</b>                                                | 1.033                                                                                                                                                          | 1.063                                                                                                   | 1.049                                                                                                   |
| <b>Final R indices [<i>I</i> &gt; 2<math>\sigma</math>(<i>I</i>)]</b> | <i>R</i> <sub>1</sub> = 0.0320, <i>wR</i> <sub>2</sub><br>= 0.0754                                                                                             | <i>R</i> <sub>1</sub> = 0.0294, <i>wR</i> <sub>2</sub><br>= 0.0642                                      | <i>R</i> <sub>1</sub> = 0.0375, <i>wR</i> <sub>2</sub><br>= 0.0867                                      |
| <b>R indices (all data)</b>                                           | <i>R</i> <sub>1</sub> = 0.0421, <i>wR</i> <sub>2</sub><br>= 0.0784                                                                                             | <i>R</i> <sub>1</sub> = 0.0359, <i>wR</i> <sub>2</sub><br>= 0.0660                                      | <i>R</i> <sub>1</sub> = 0.0452, <i>wR</i> <sub>2</sub><br>= 0.0909                                      |
| <b>Largest diff. peak (e•Å)</b>                                       | 0.983                                                                                                                                                          | 0.350                                                                                                   | 0.189                                                                                                   |
| <b>Largest diff. hole (e•Å)</b>                                       | -0.501                                                                                                                                                         | -0.418                                                                                                  | -0.218                                                                                                  |
| <b>CCDC number</b>                                                    | 2150669                                                                                                                                                        | 2150670                                                                                                 | 2150671                                                                                                 |

Single crystal was obtained from dichloromethane/hexane. Color labels: gray, carbon; white, hydrogen; orange, bromine; blue, nitrogen; red, oxygen. The thermal ellipsoids are represented at 50% probability level. All hydrogen atoms were omitted for clarity.

Temperature-variable NMR spectra of **10a** (DMSO-*d*<sub>6</sub>)

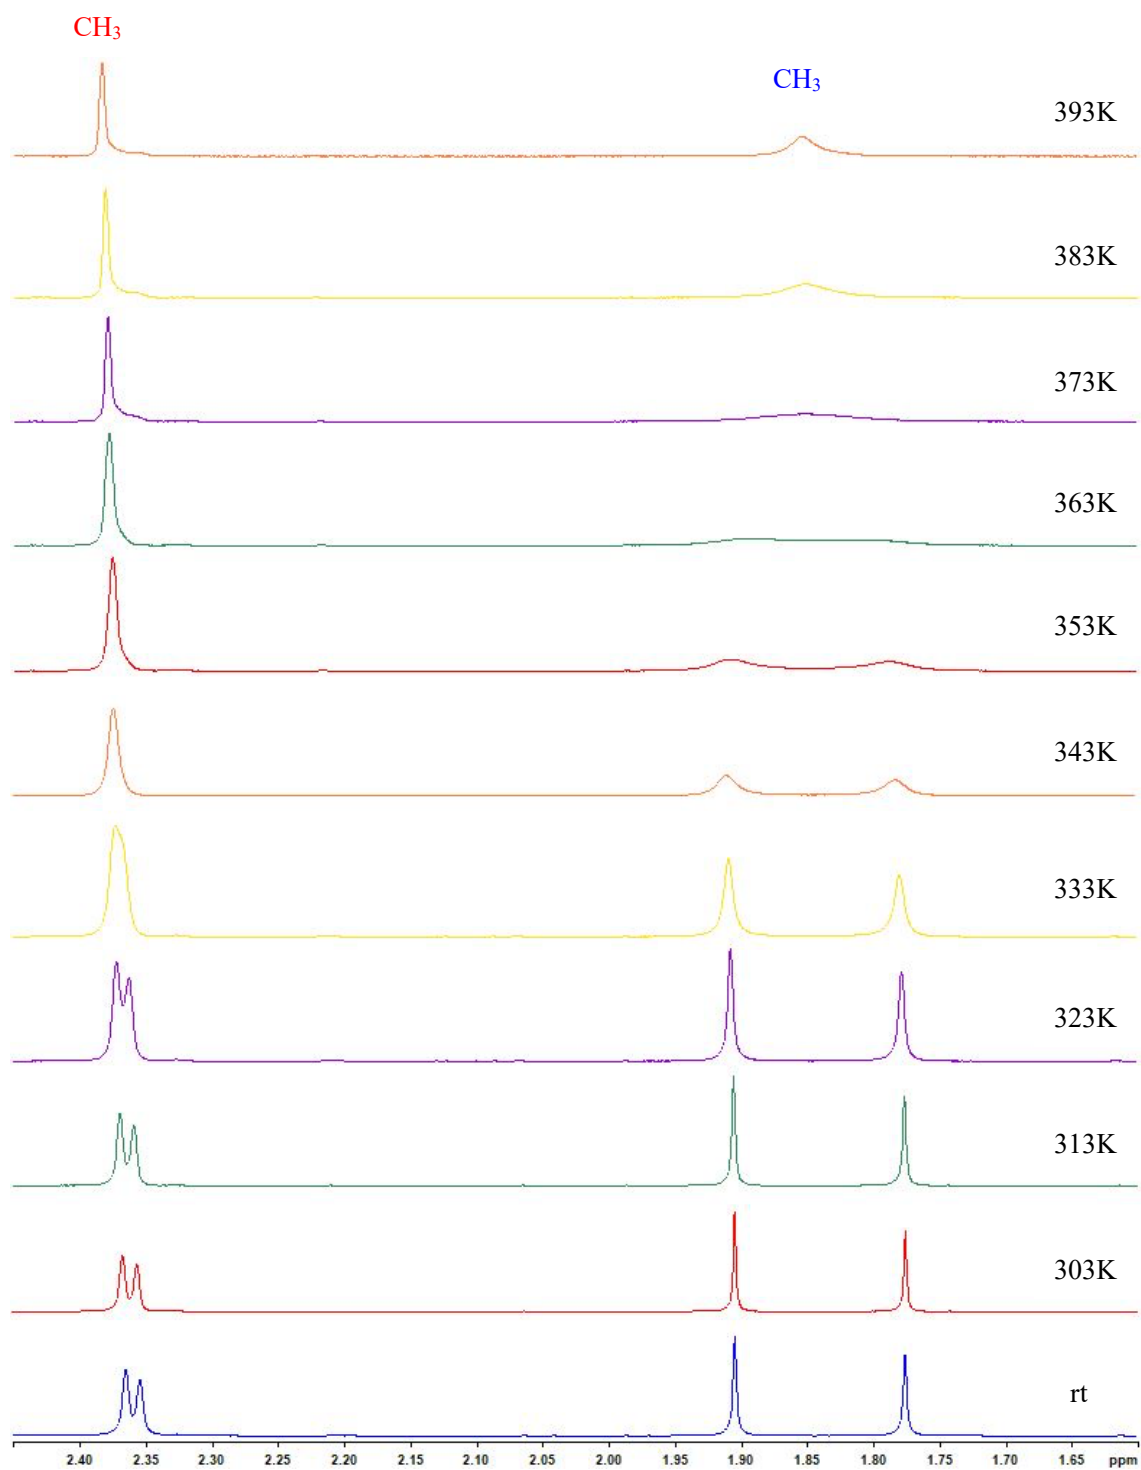

**Table S1.** Pd-catalyzed intramolecular cyclization of **2b**

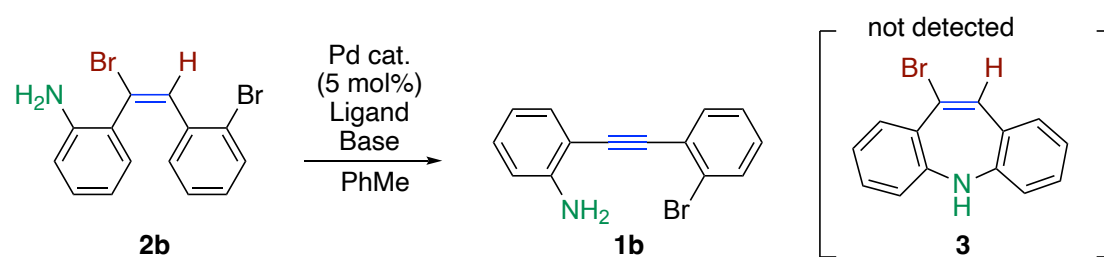

| Entry | Cat.                               | Ligand<br>(mol%)                | Base<br>(equiv.)                    | Temp./<br>°C | Time/<br>h | Yield<br>of <b>1b</b> /% <sup>a</sup> | Recovery<br>of <b>2b</b> /% <sup>a</sup> |
|-------|------------------------------------|---------------------------------|-------------------------------------|--------------|------------|---------------------------------------|------------------------------------------|
| 1     | Pd(OAc) <sub>2</sub>               | PPh <sub>3</sub> (15)           | Cs <sub>2</sub> CO <sub>3</sub> (2) | rt           | 17         | 0                                     | 75                                       |
| 2     | Pd(OAc) <sub>2</sub>               | PPh <sub>3</sub> (15)           | Cs <sub>2</sub> CO <sub>3</sub> (2) | 90           | 24         | 38                                    | 0                                        |
| 3     | Pd <sub>2</sub> (dba) <sub>3</sub> | <i>t</i> -Bu <sub>3</sub> P (5) | Cs <sub>2</sub> CO <sub>3</sub> (1) | rt           | 3          | 0                                     | 91                                       |
| 4     | Pd <sub>2</sub> (dba) <sub>3</sub> | <i>t</i> -Bu <sub>3</sub> P (5) | NaOBu <sup>t</sup> (2)              | rt           | 3          | 90                                    | 0                                        |
| 5     | Pd <sub>2</sub> (dba) <sub>3</sub> | <i>t</i> -Bu <sub>3</sub> P (5) | —                                   | rt           | 3          | 0                                     | 93                                       |
| 6     | —                                  | —                               | NaOBu <sup>t</sup> (2)              | rt           | 3          | 0                                     | 94                                       |

<sup>a</sup> Determined by <sup>1</sup>H NMR.

## Copies of NMR spectra

### *E*-2-[(2-bromophenyl)-1-bromoethenyl]aniline (2b)

$^1\text{H}$  NMR (400 MHz,  $\text{CDCl}_3$ )

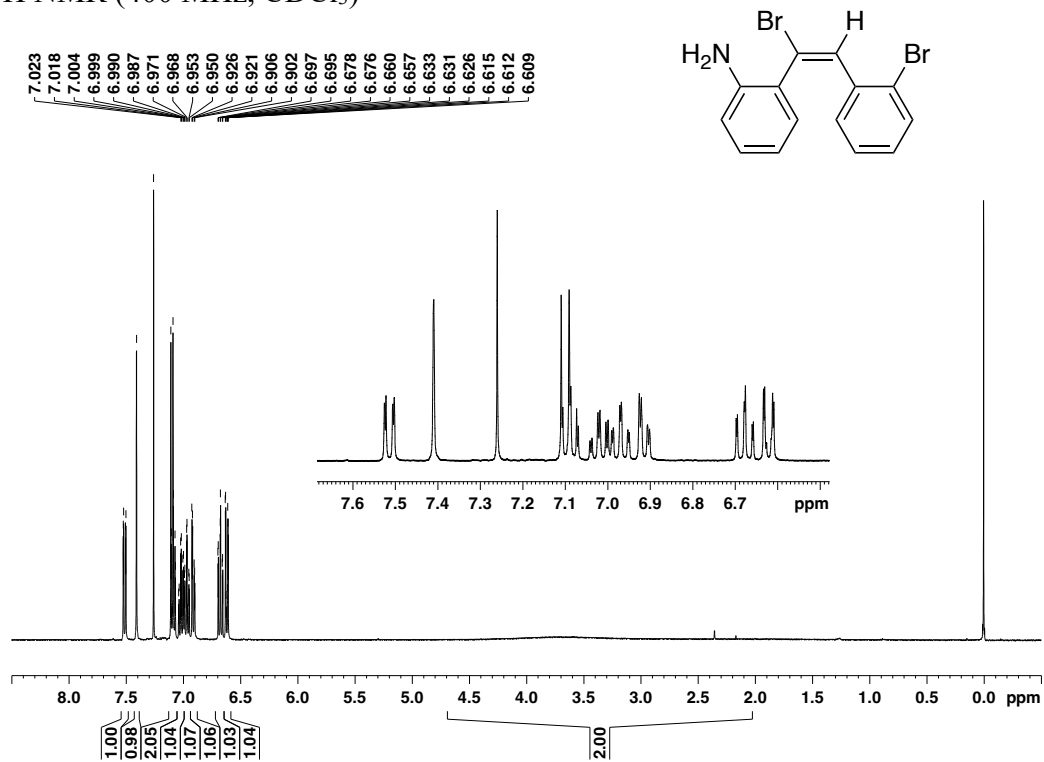

$^{13}\text{C}\{^1\text{H}\}$  NMR (100 MHz,  $\text{CDCl}_3$ )

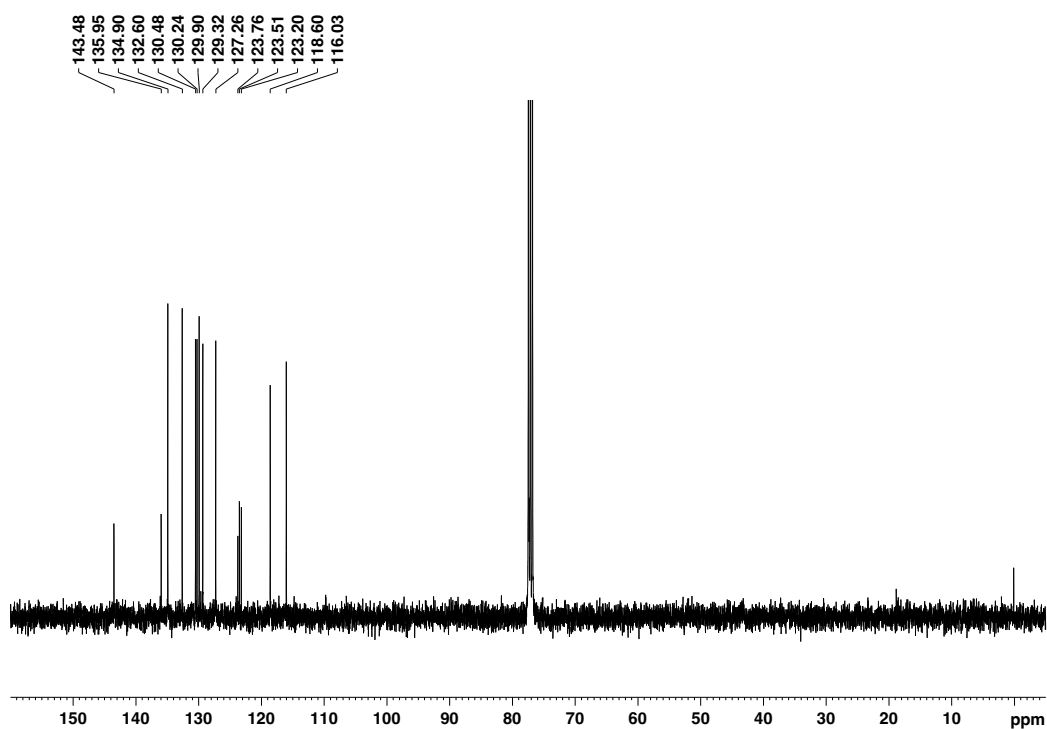

DEPT NMR (100 MHz, CDCl<sub>3</sub>)

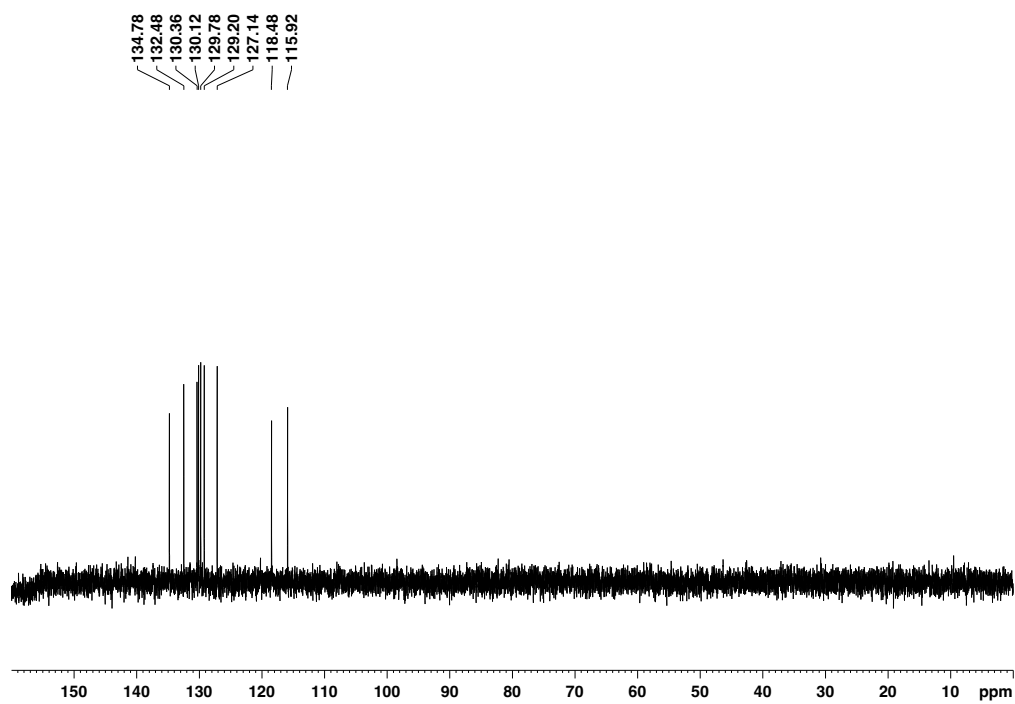

***E*-2-[2-(2-Bromophenyl)-1-chloroethenyl]aniline (2c)**

$^1\text{H}$  NMR (400 MHz,  $\text{CDCl}_3$ )

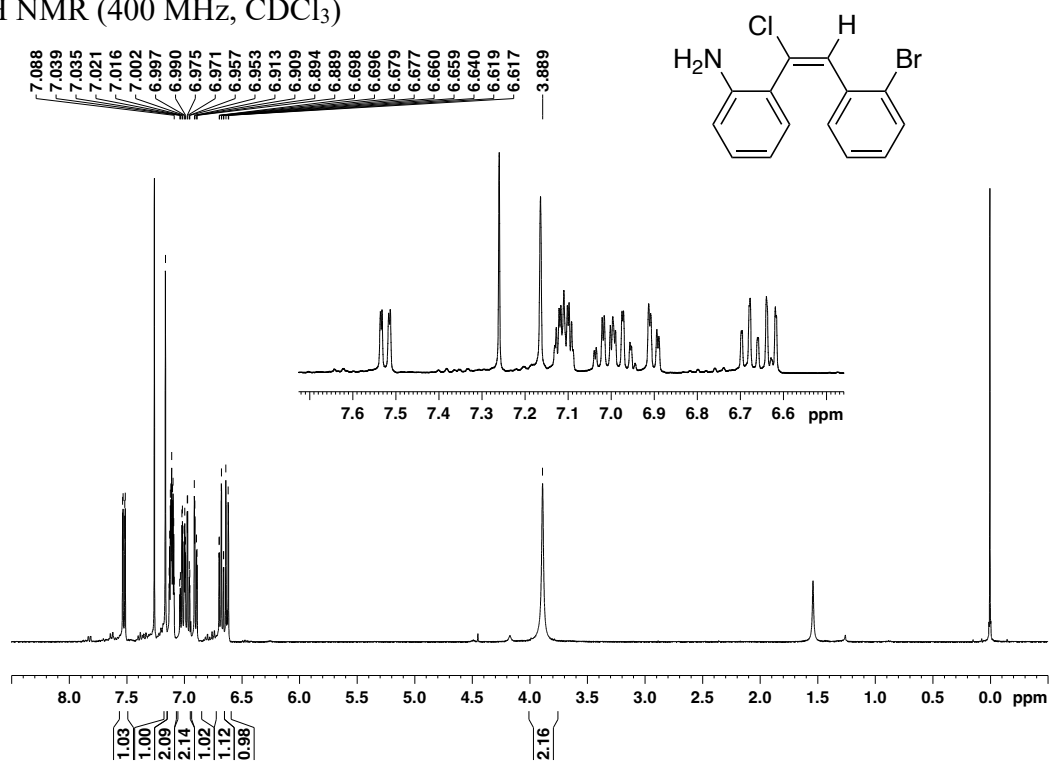

$^{13}\text{C}\{^1\text{H}\}$  NMR (100 MHz,  $\text{CDCl}_3$ )

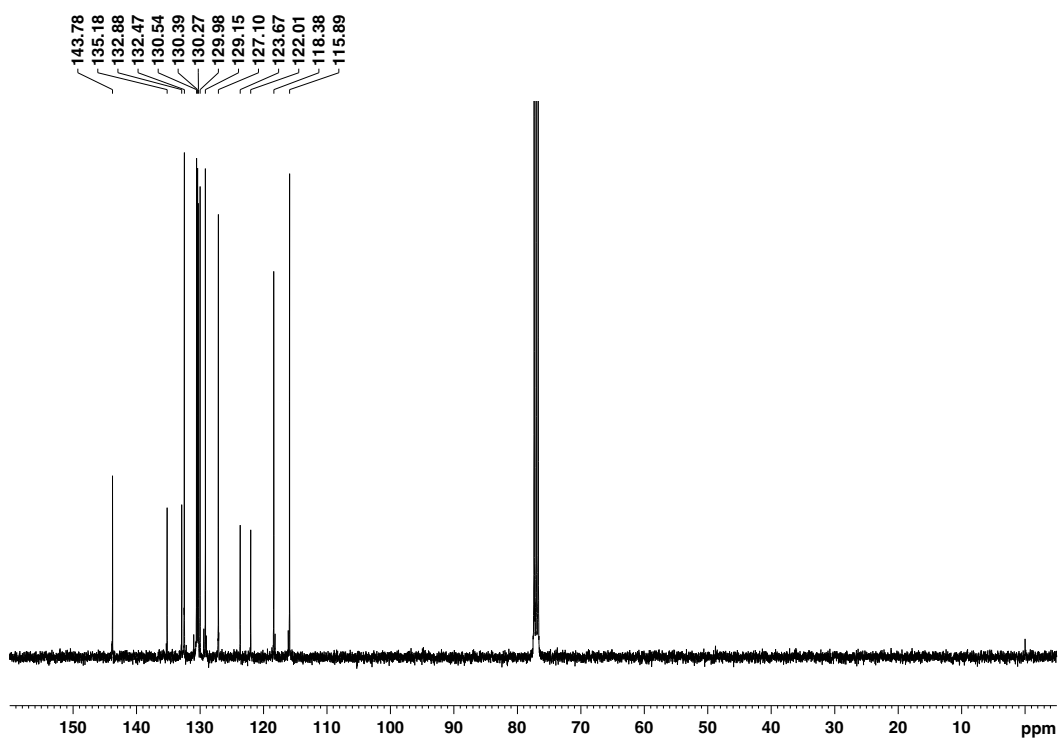

DEPT NMR (100 MHz, CDCl<sub>3</sub>)

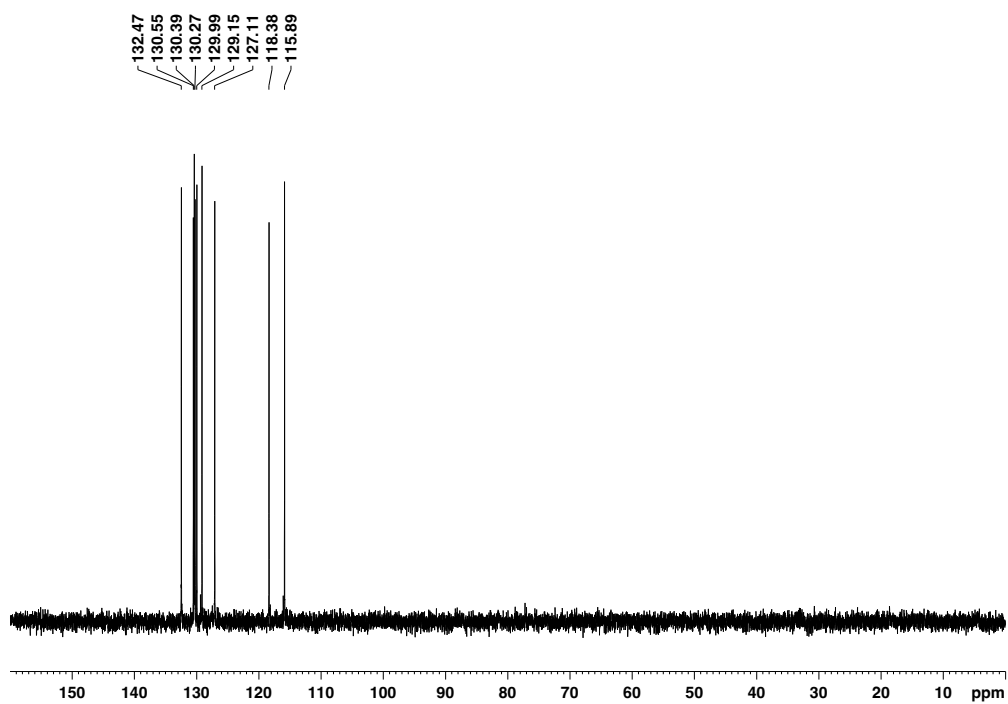



### *E*-2-[2-(2-Bromophenyl)-1-bromoethenyl]-4-fluoroaniline (2d)

$^1\text{H}$  NMR (400 MHz,  $\text{CDCl}_3$ )

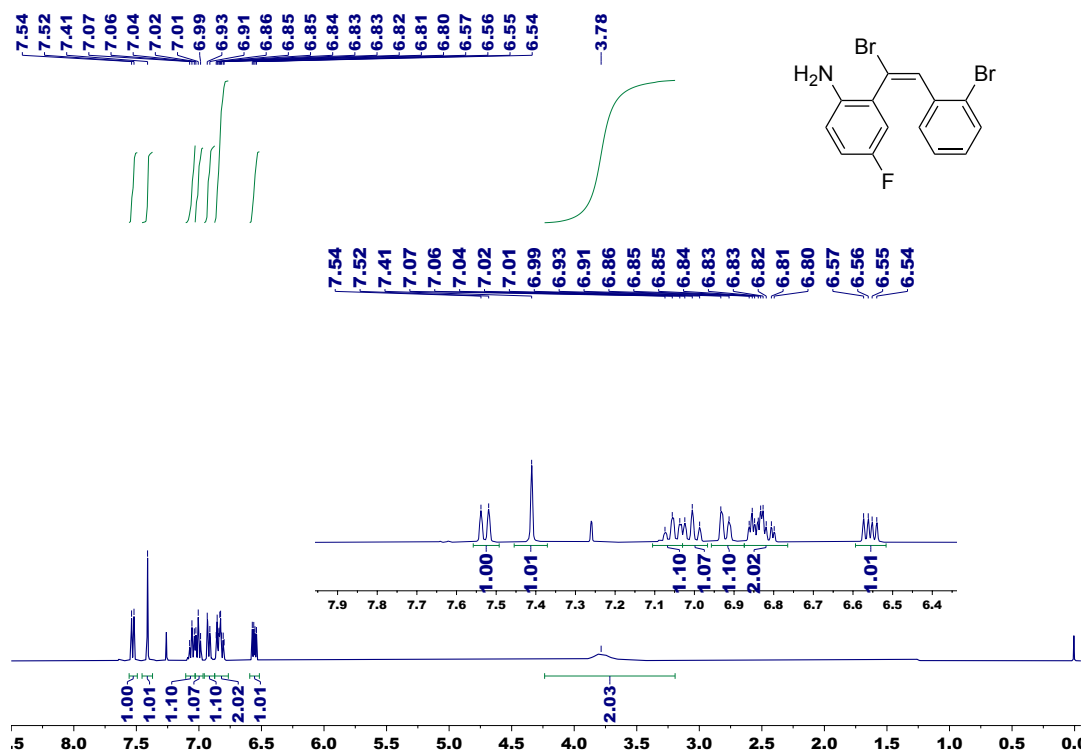

$^{13}\text{C}\{^1\text{H}\}$  NMR (100 MHz,  $\text{CDCl}_3$ )

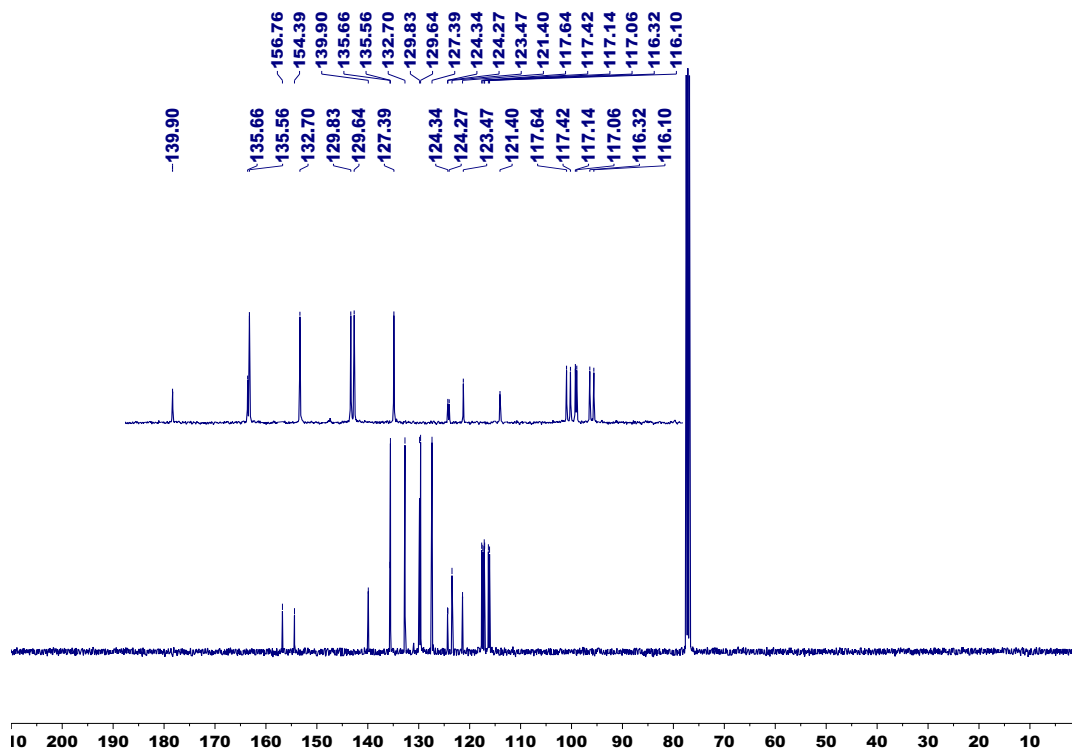

DEPT NMR (100 MHz, CDCl<sub>3</sub>)

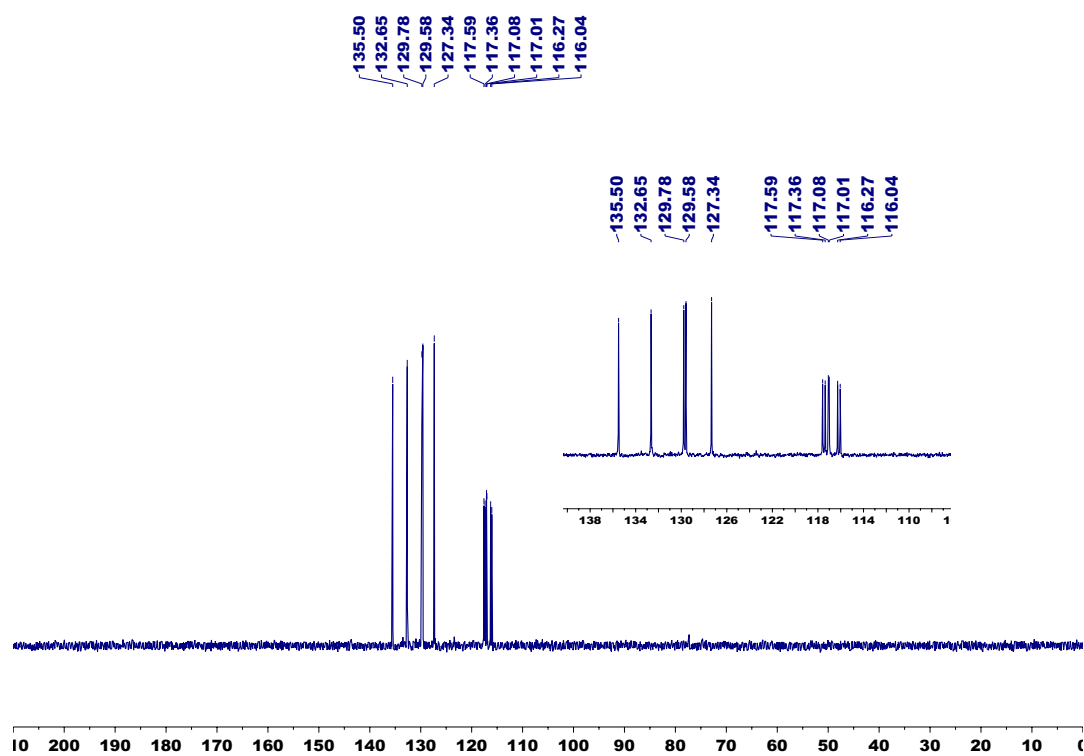

***E*-1-(2-Acetylamino)phenyl-1-bromo-2-(2-bromophenyl)ethene (5a)**

$^1\text{H}$  NMR (400 MHz,  $\text{CDCl}_3$ )

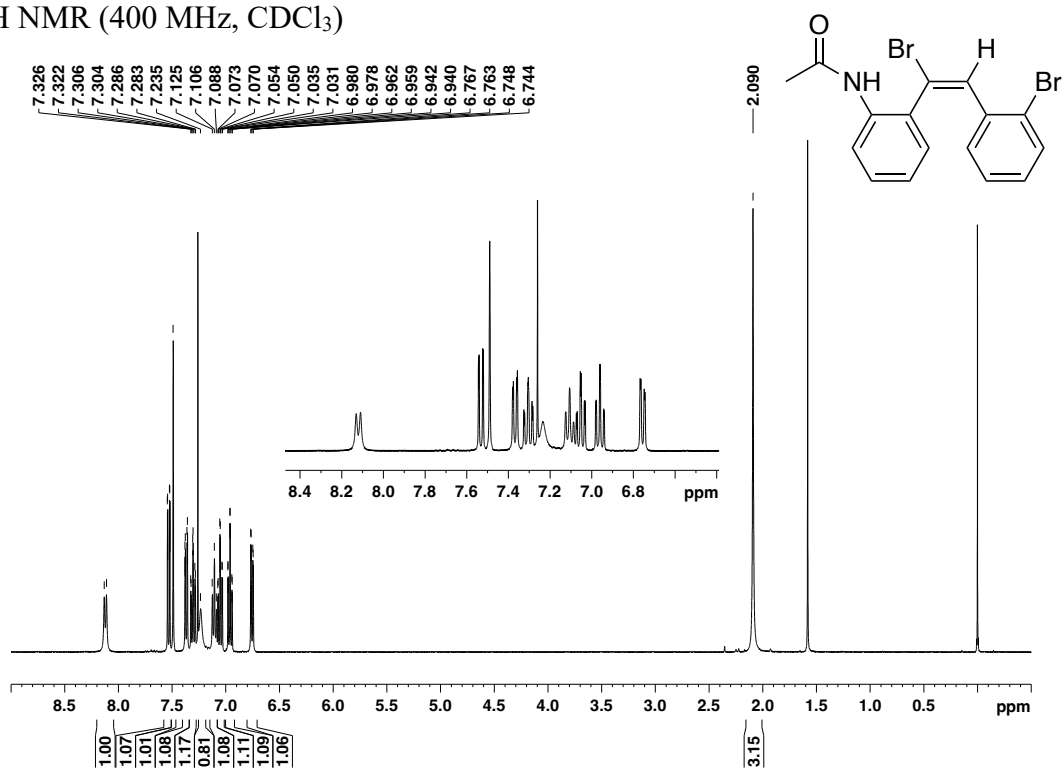

$^{13}\text{C}\{^1\text{H}\}$  NMR (100 MHz,  $\text{CDCl}_3$ )

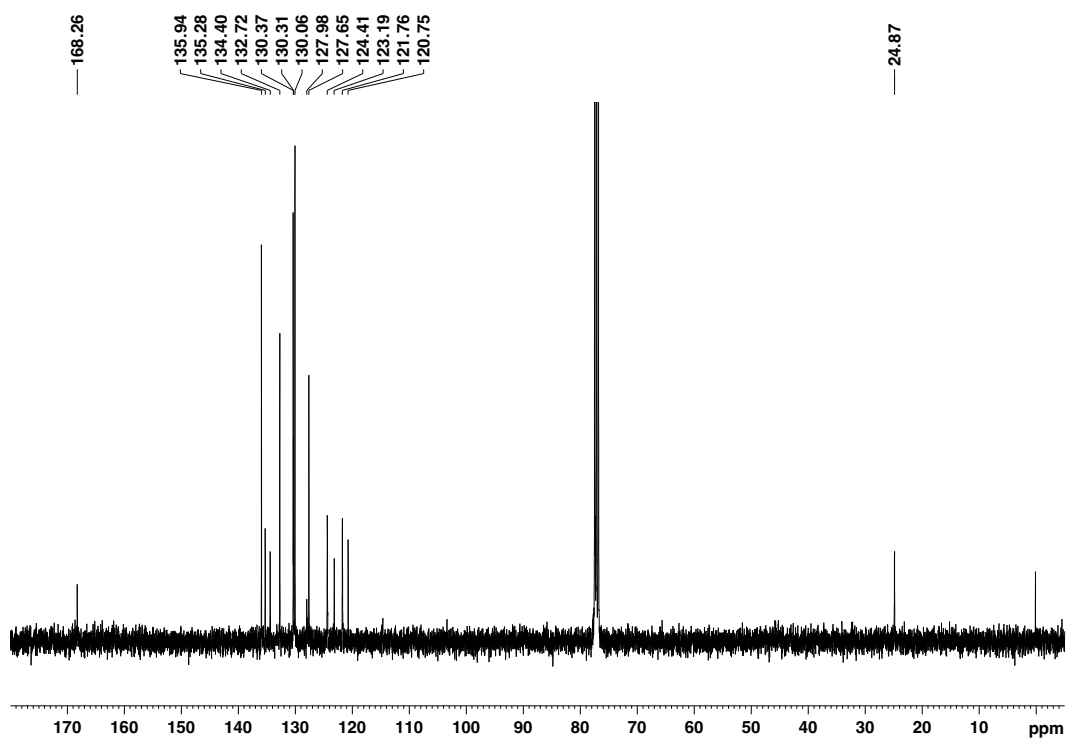

DEPT NMR (100 MHz, CDCl<sub>3</sub>)

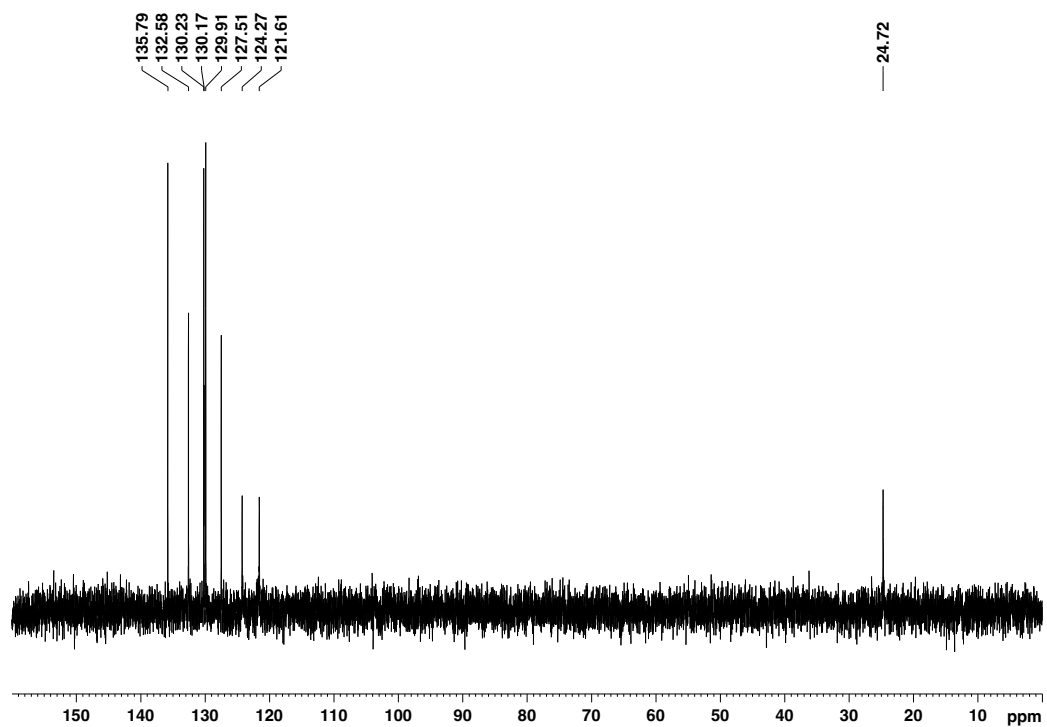

***E*-1-(2-Acetylamino-4-fluoro)phenyl-1-bromo-2-(2-bromophenyl)ethene (5b)**

<sup>1</sup>H NMR (400 MHz, CDCl<sub>3</sub>)

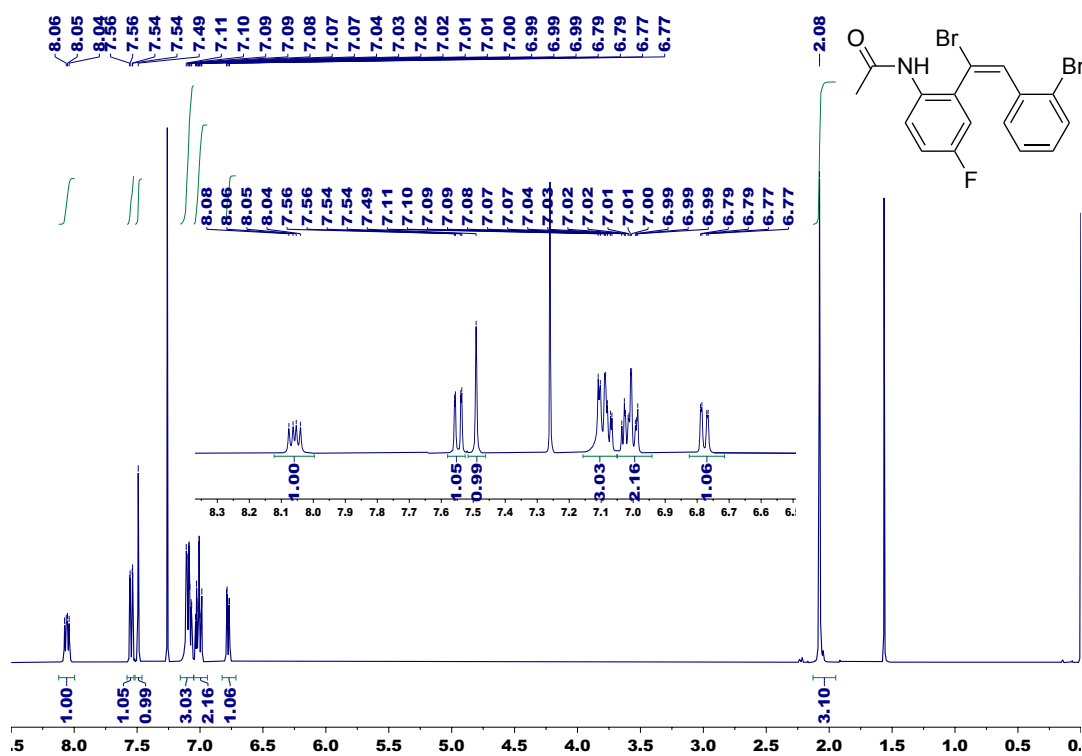

<sup>13</sup>C{<sup>1</sup>H} NMR (100 MHz, CDCl<sub>3</sub>)

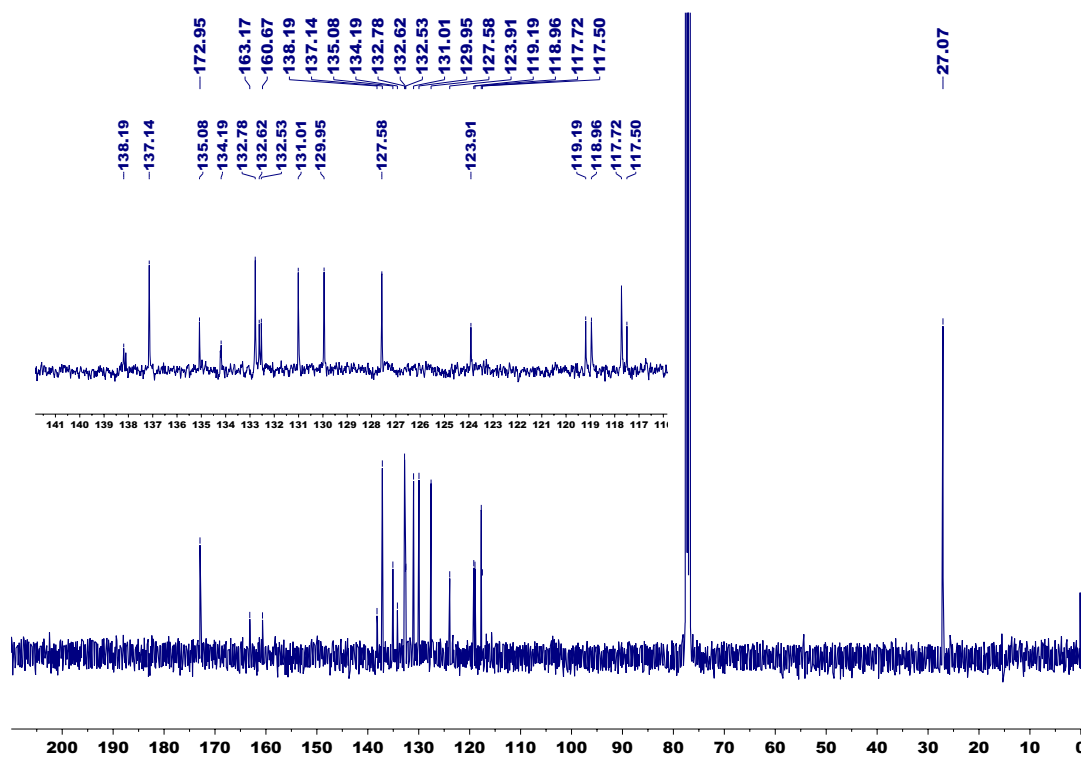

DEPT NMR (100 MHz, CDCl<sub>3</sub>)

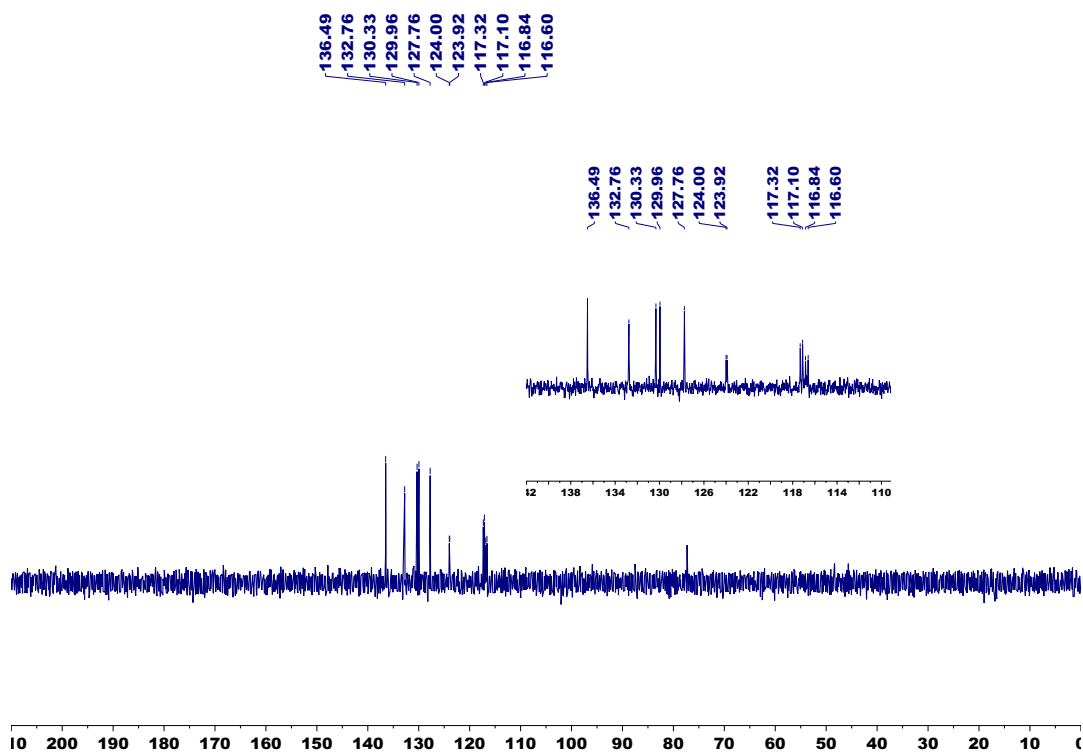

# Z-2-(2-Bromophenyl)-1-(2-ethanoylamino)phenyl-1-(4-methylphenyl)ethene (9a)

$^1\text{H}$  NMR (400 MHz,  $\text{CDCl}_3$ )

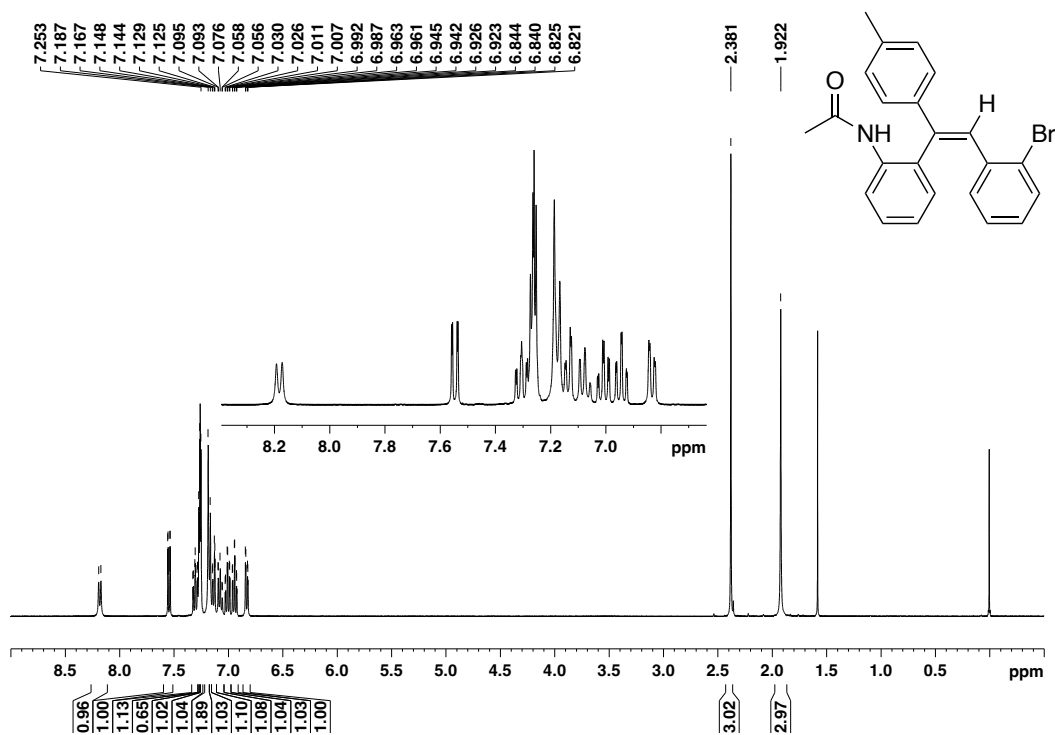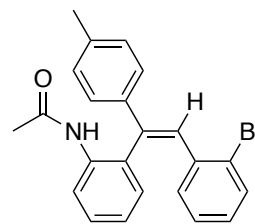

$^{13}\text{C}\{^1\text{H}\}$  NMR (100 MHz,  $\text{CDCl}_3$ )

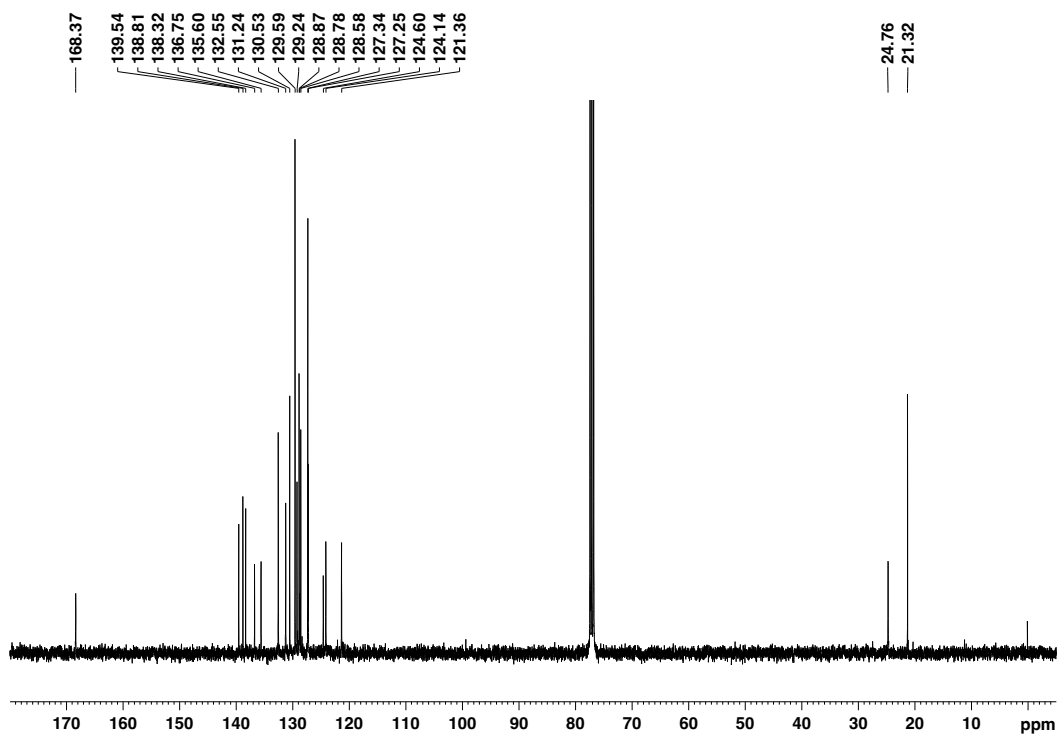

DEPT NMR (100 MHz, CDCl<sub>3</sub>)

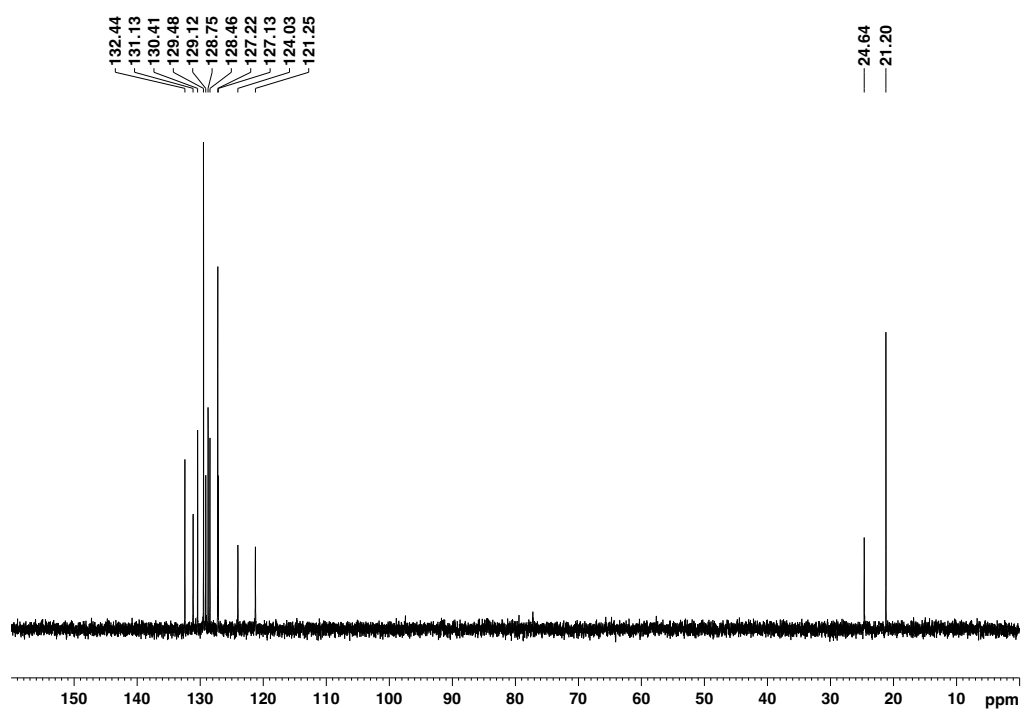



# Z-2-(2-Bromophenyl)-1-(2-acetylaminophenyl)-1-(4-methoxyphenyl)ethene (9b)

$^1\text{H}$  NMR (400 MHz,  $\text{CDCl}_3$ )

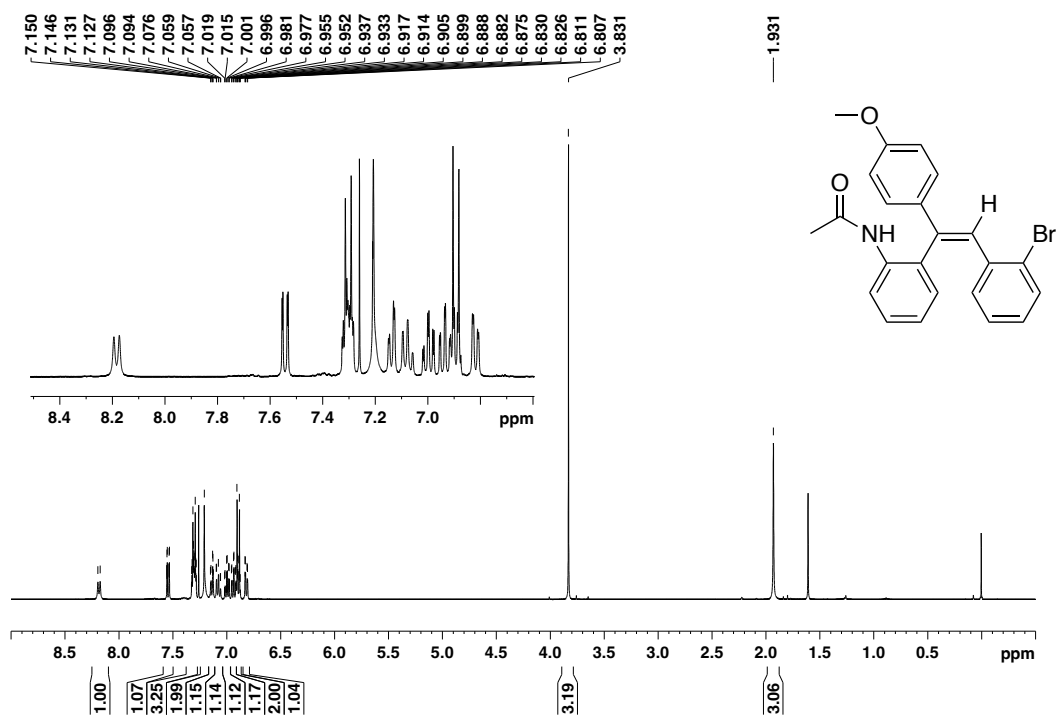

$^{13}\text{C}\{^1\text{H}\}$  NMR (100 MHz,  $\text{CDCl}_3$ )

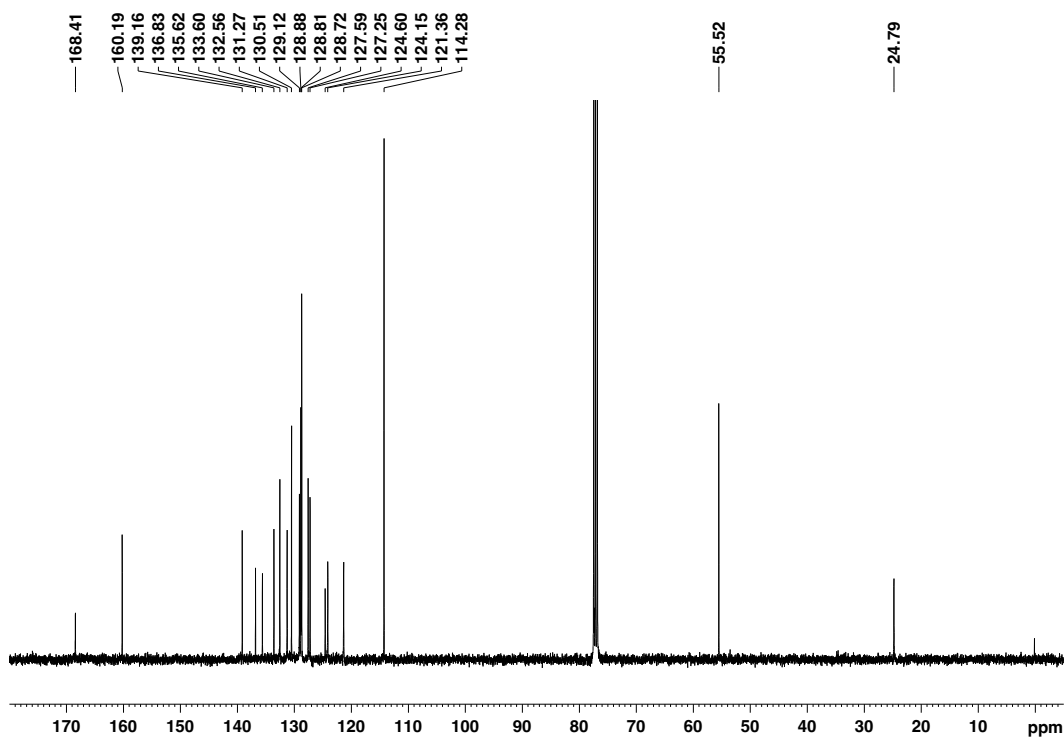

DEPT NMR (100 MHz, CDCl<sub>3</sub>)

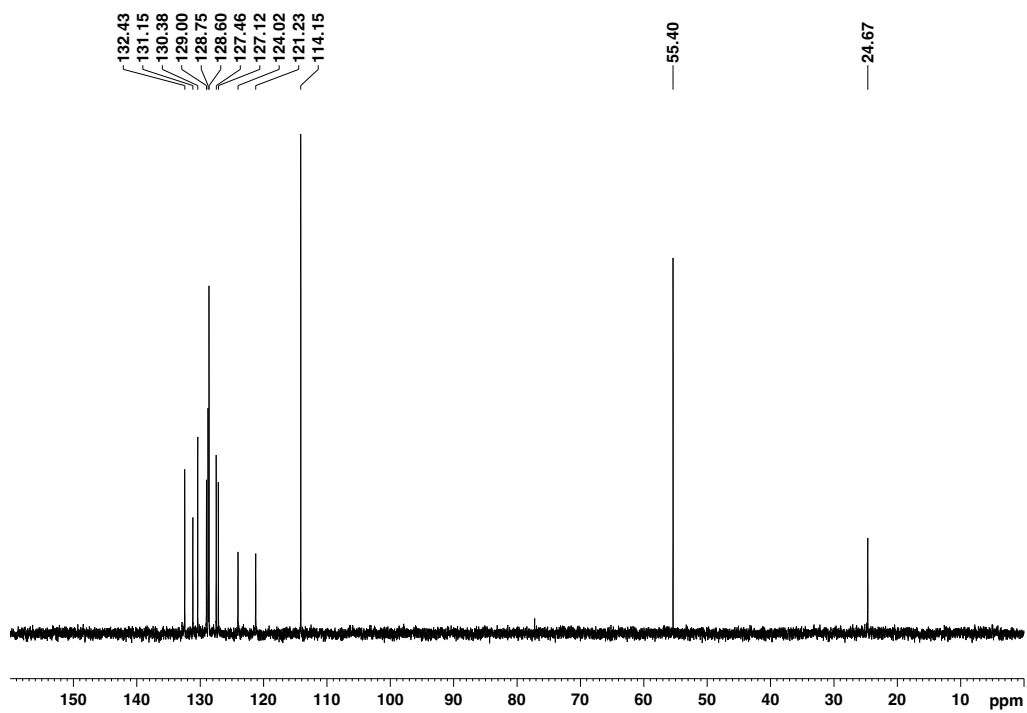

### Z-2-(2-Bromophenyl)-1-(2-acetylaminophenyl)-1-(4-chlorophenyl)ethene (9c)

$^1\text{H}$  NMR (400 MHz,  $\text{CDCl}_3$ )

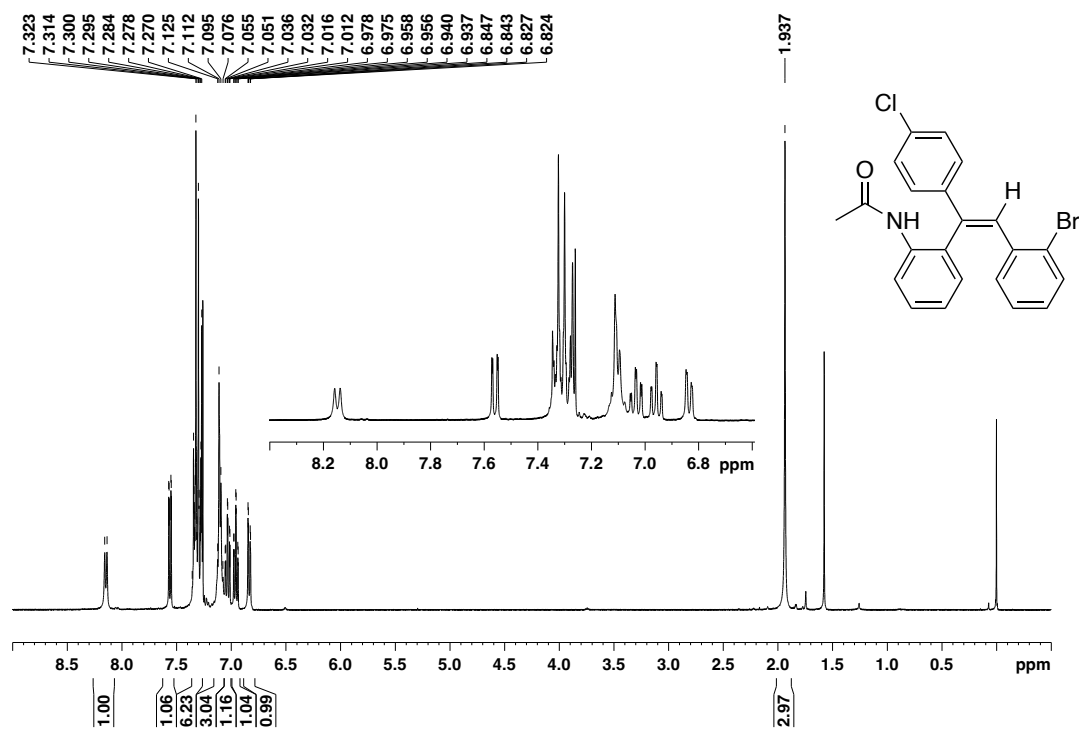

$^{13}\text{C}\{^1\text{H}\}$  NMR (100 MHz,  $\text{CDCl}_3$ )

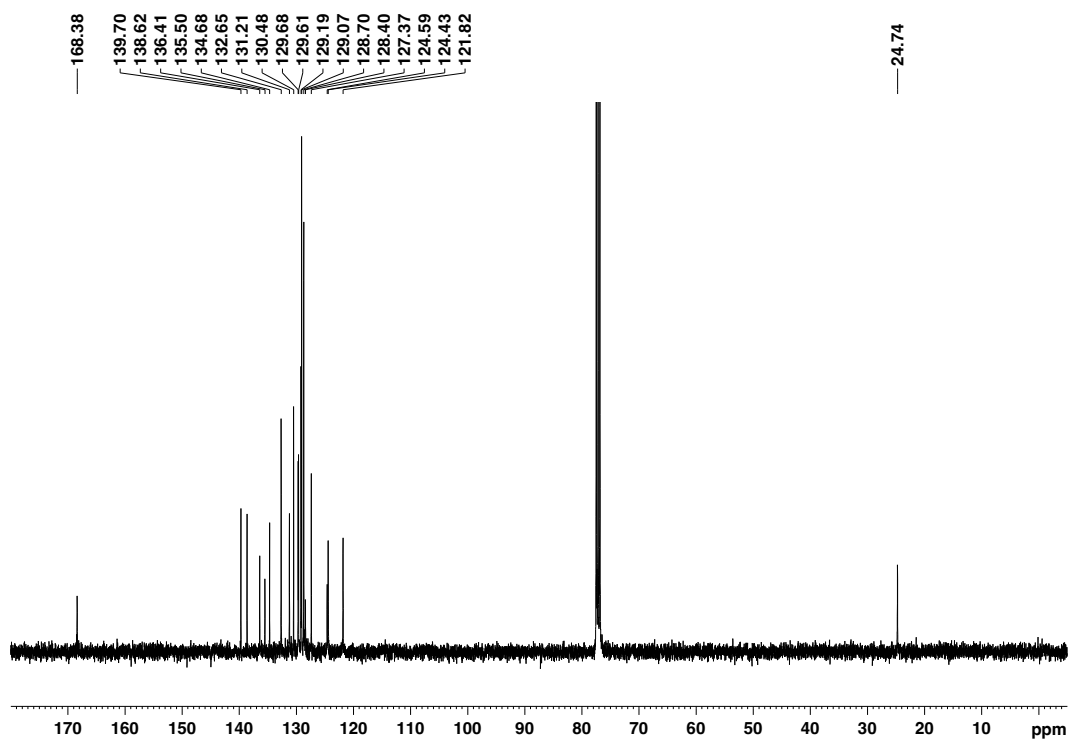

DEPT NMR (100 MHz, CDCl<sub>3</sub>)

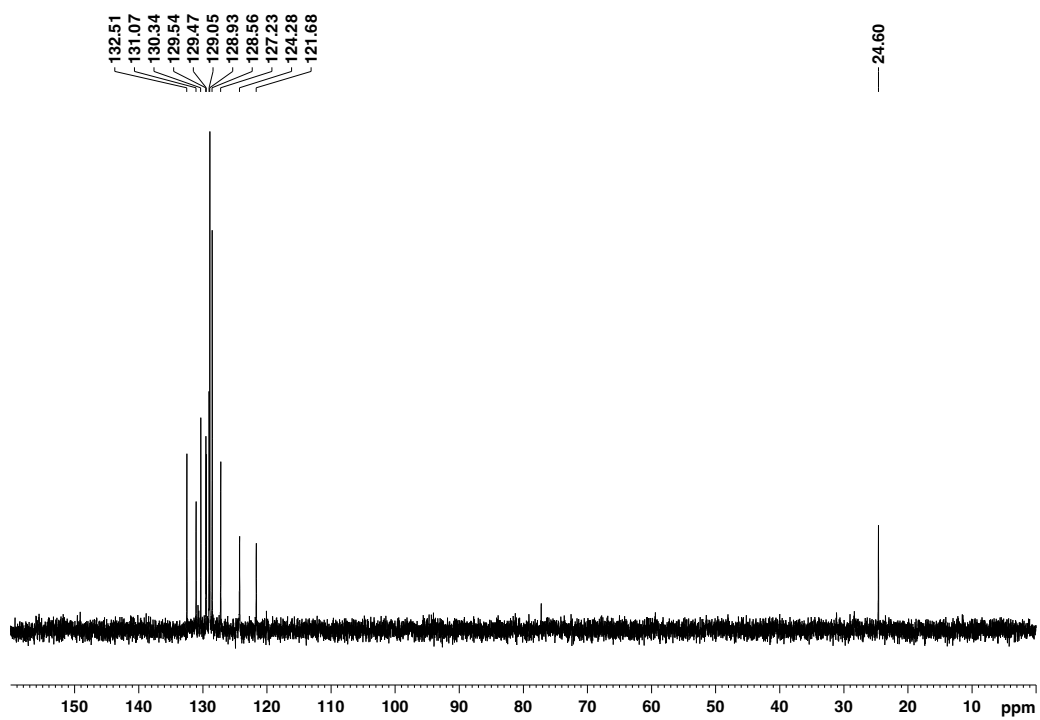

**Z-2-(2-Bromophenyl)-1-(2-acetylaminophenyl)-1-(4-methoxycarbonylphenyl)ethene (9d)**

$^1\text{H}$  NMR (400 MHz,  $\text{CDCl}_3$ )

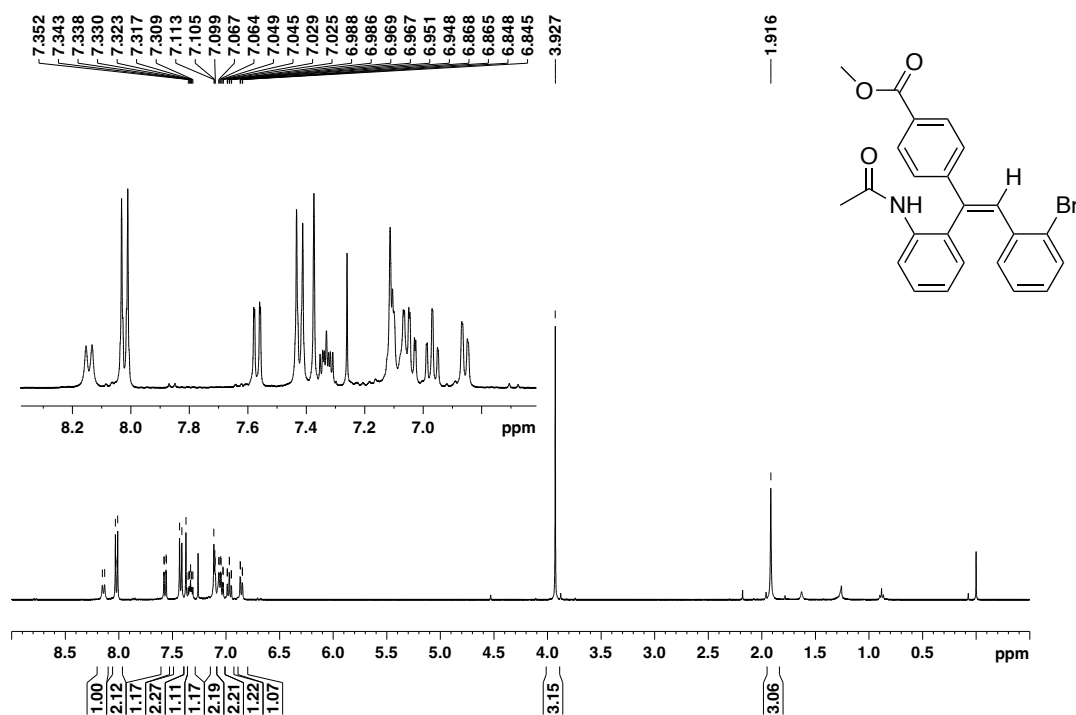

$^{13}\text{C}\{^1\text{H}\}$  NMR (100 MHz,  $\text{CDCl}_3$ )

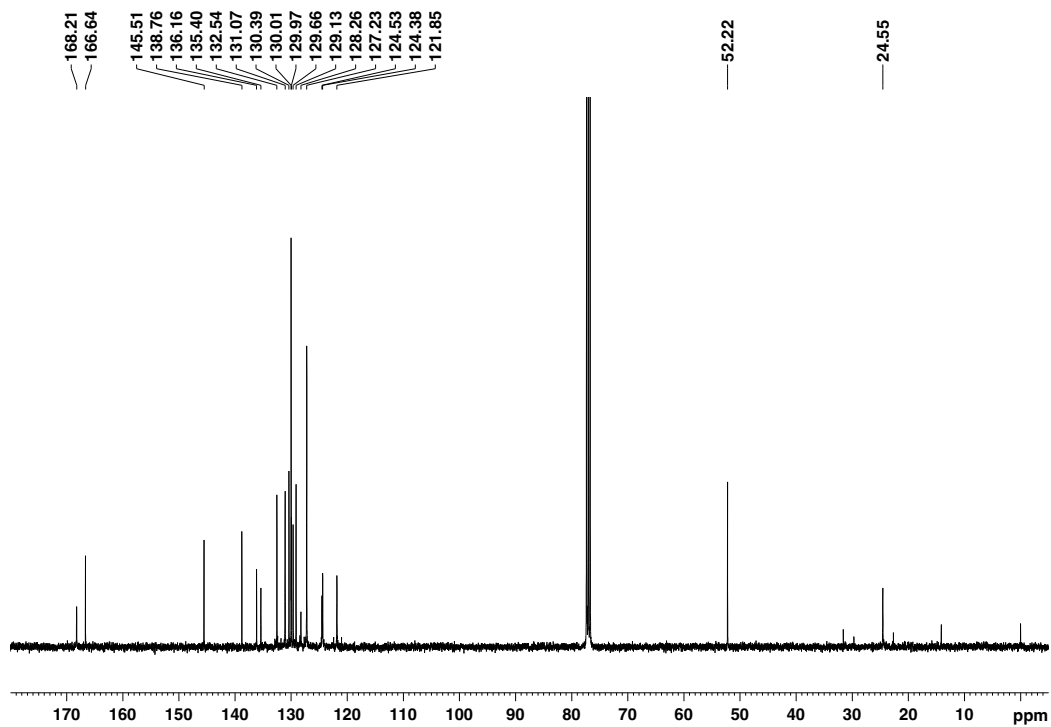

DEPT NMR (100 MHz, CDCl<sub>3</sub>)

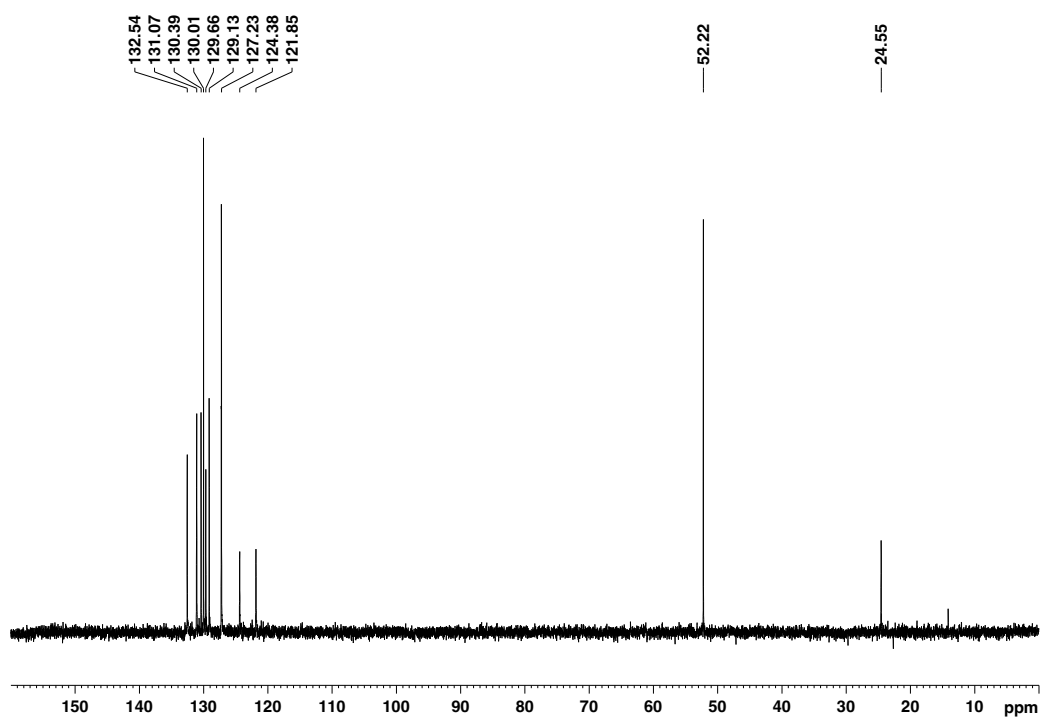

**Z-2-(2-Bromophenyl)-1-(2-ethanoylamino-4-fluoro)phenyl-1-(4-methylphenyl)ethene (9e)**

$^1\text{H NMR}$  (400 MHz,  $\text{CDCl}_3$ )

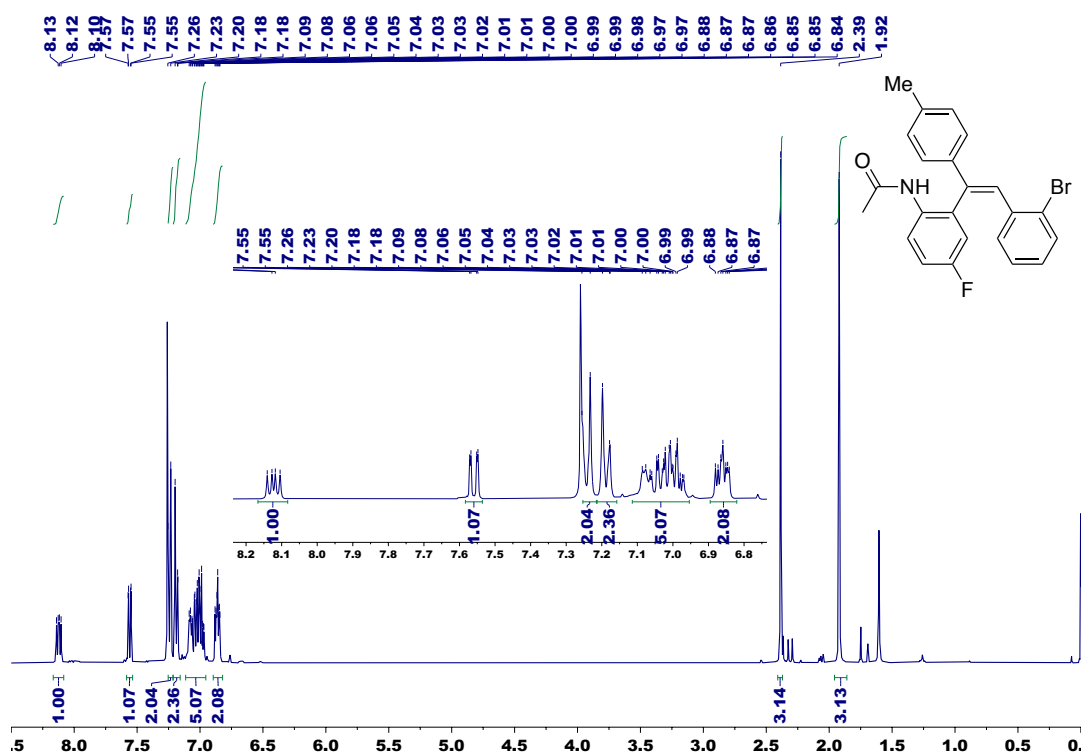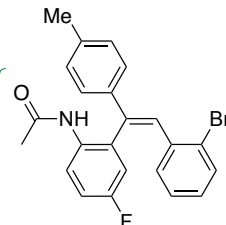

$^{13}\text{C}\{^1\text{H}\}$  NMR (100 MHz,  $\text{CDCl}_3$ )

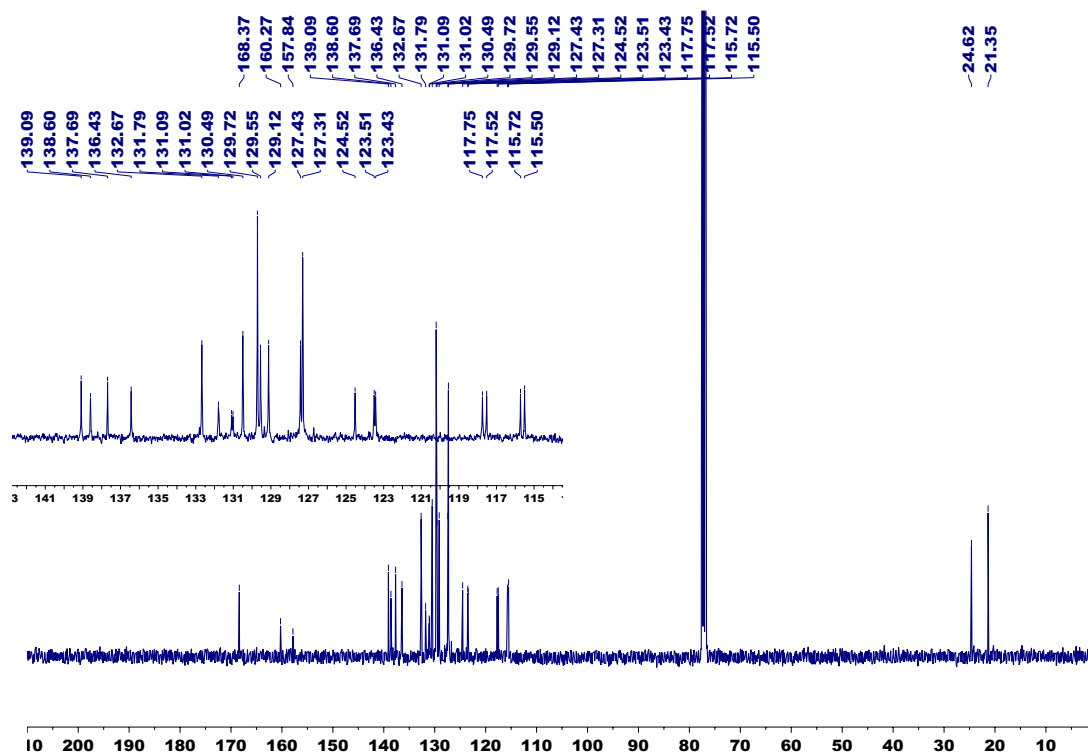

DEPT NMR (100 MHz, CDCl<sub>3</sub>)

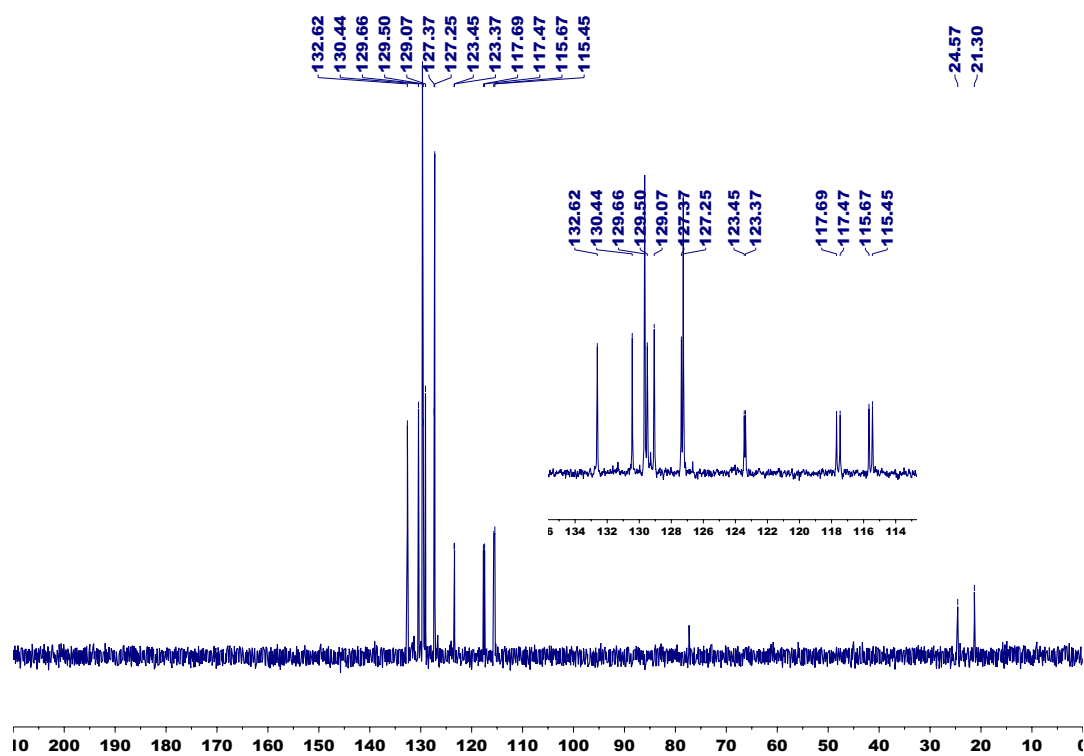

<sup>19</sup>F NMR (376.5 MHz, CDCl<sub>3</sub>)

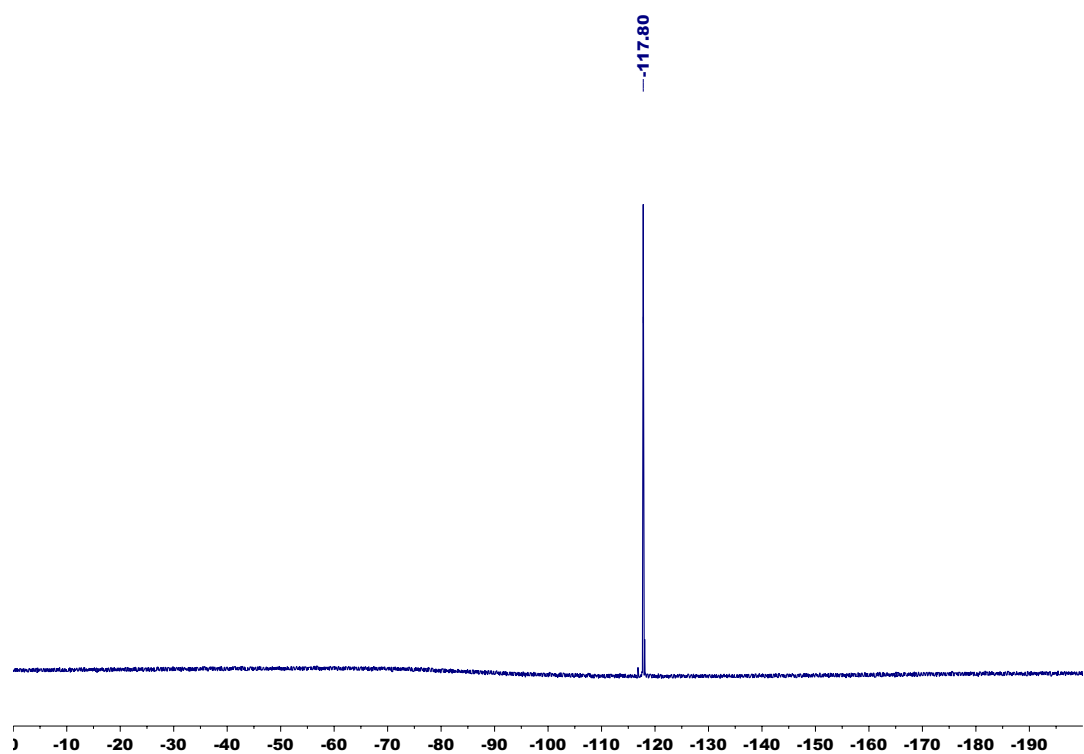



### 5-Ethanoyl-10-(4-methylphenyl)-5H-dibenzo[*b,f*]azepine (10a)

Isomeric ratio = 51/49

$^1\text{H}$  NMR (400 MHz,  $\text{CDCl}_3$ )

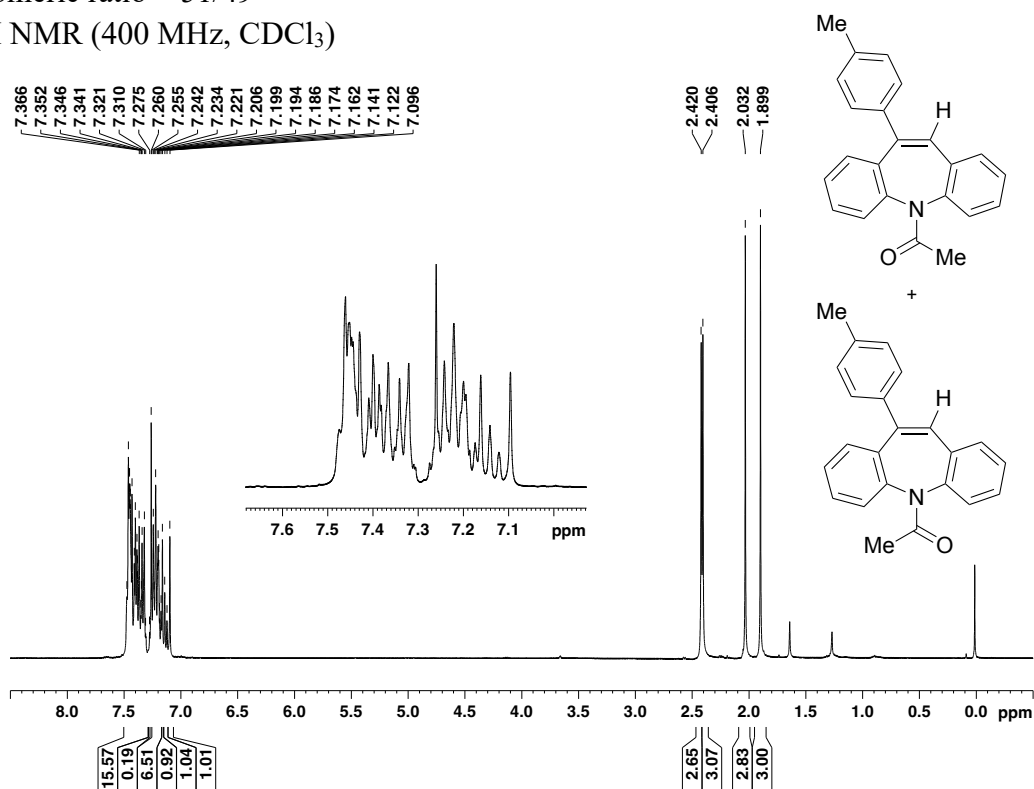

$^{13}\text{C}\{^1\text{H}\}$  NMR (100 MHz,  $\text{CDCl}_3$ )

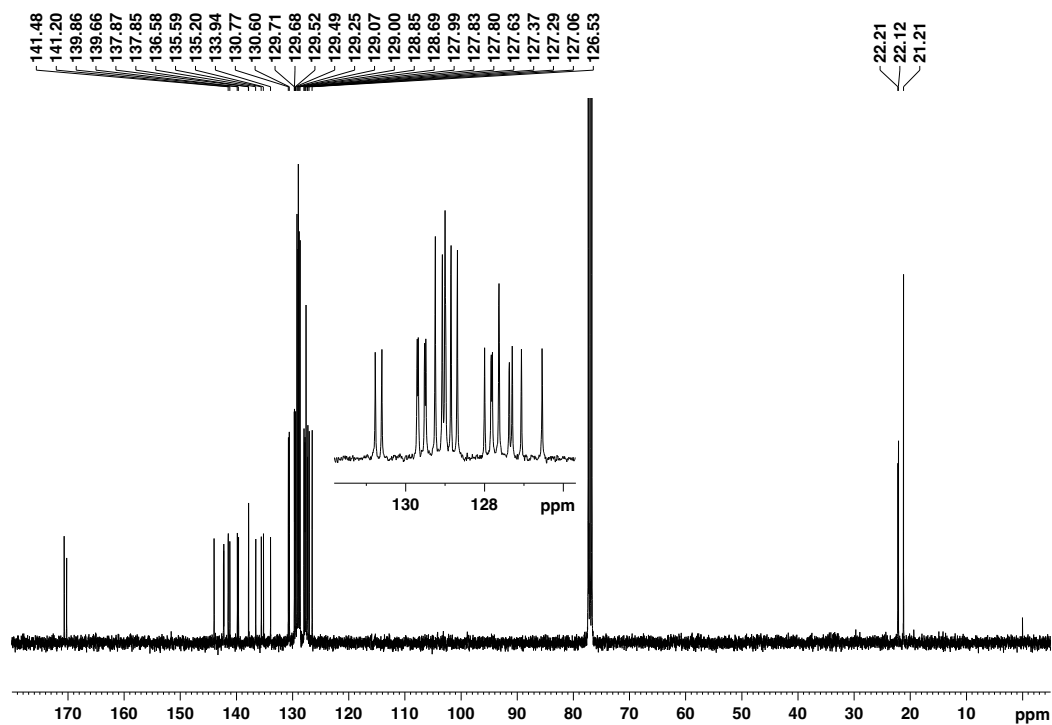

DEPT NMR (100 MHz, CDCl<sub>3</sub>)

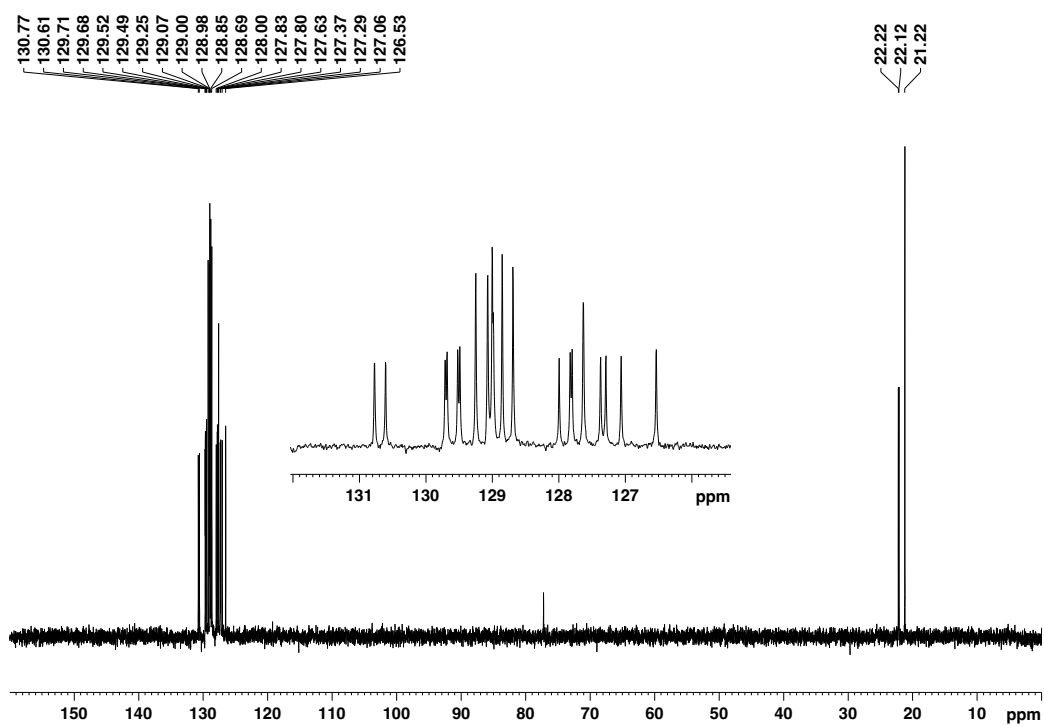

### 5-Ethanoyl-10-(4-methoxyphenyl)-5*H*-dibenzo[*b,f*]azepine (10b)

Isomeric ratio = 54/46

$^1\text{H}$  NMR (400 MHz,  $\text{CDCl}_3$ )

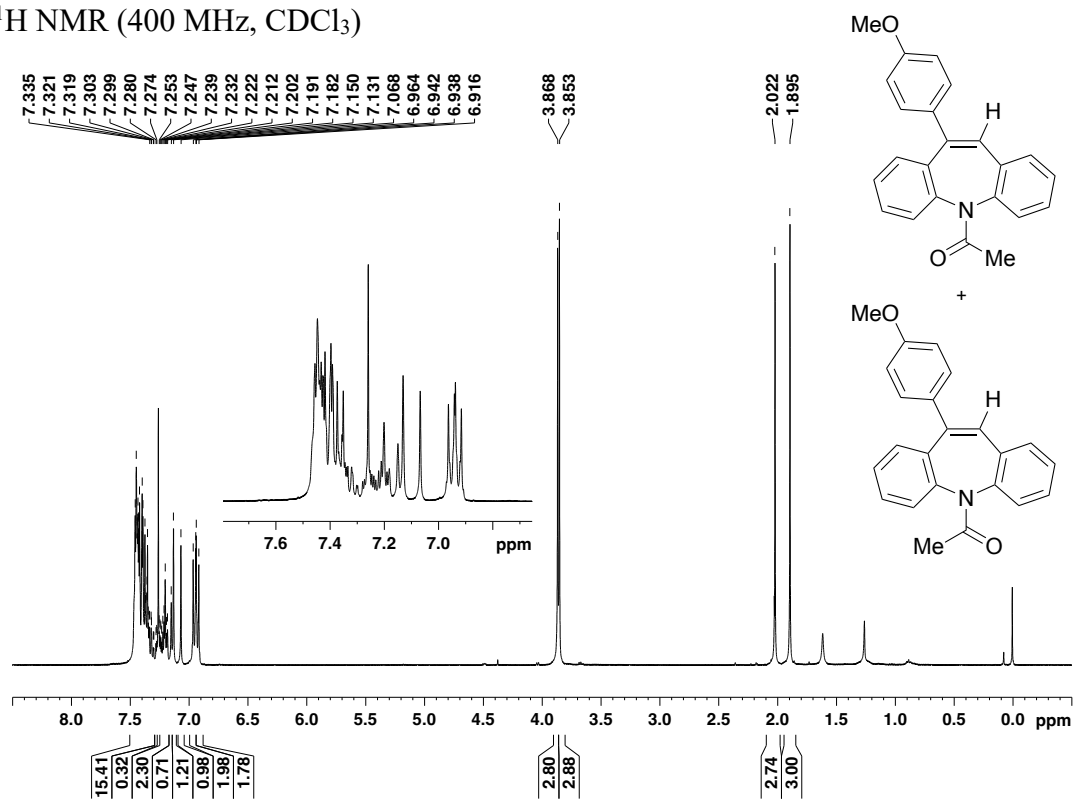

$^{13}\text{C}\{^1\text{H}\}$  NMR (100 MHz,  $\text{CDCl}_3$ )

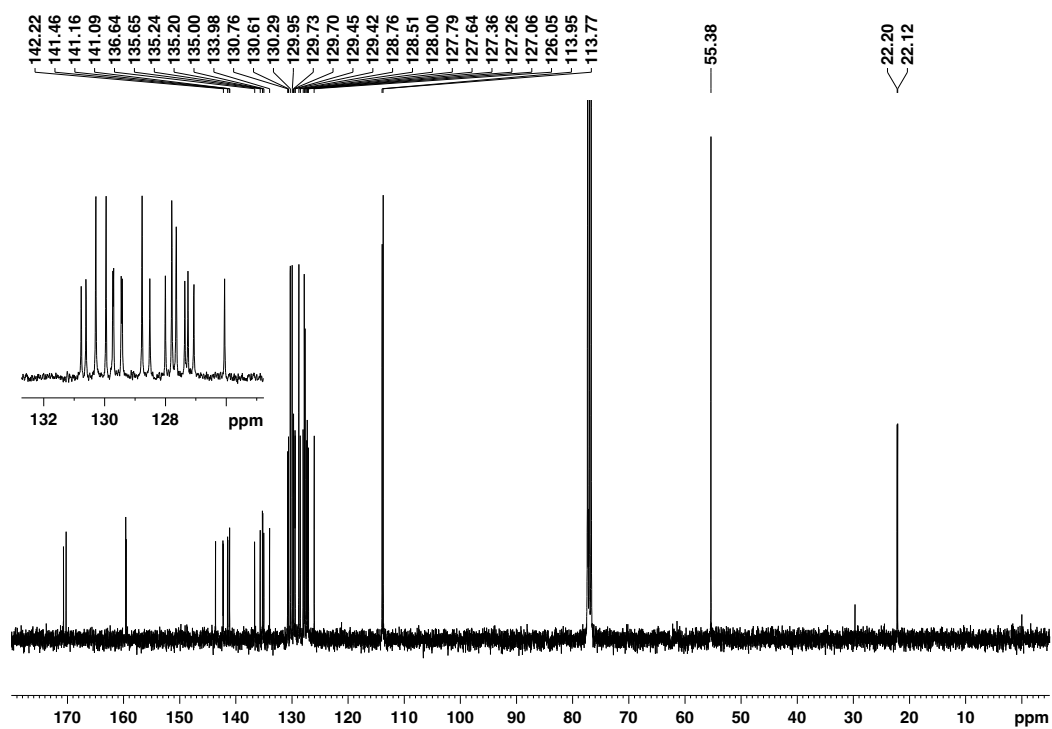

DEPT NMR (100 MHz, CDCl<sub>3</sub>)

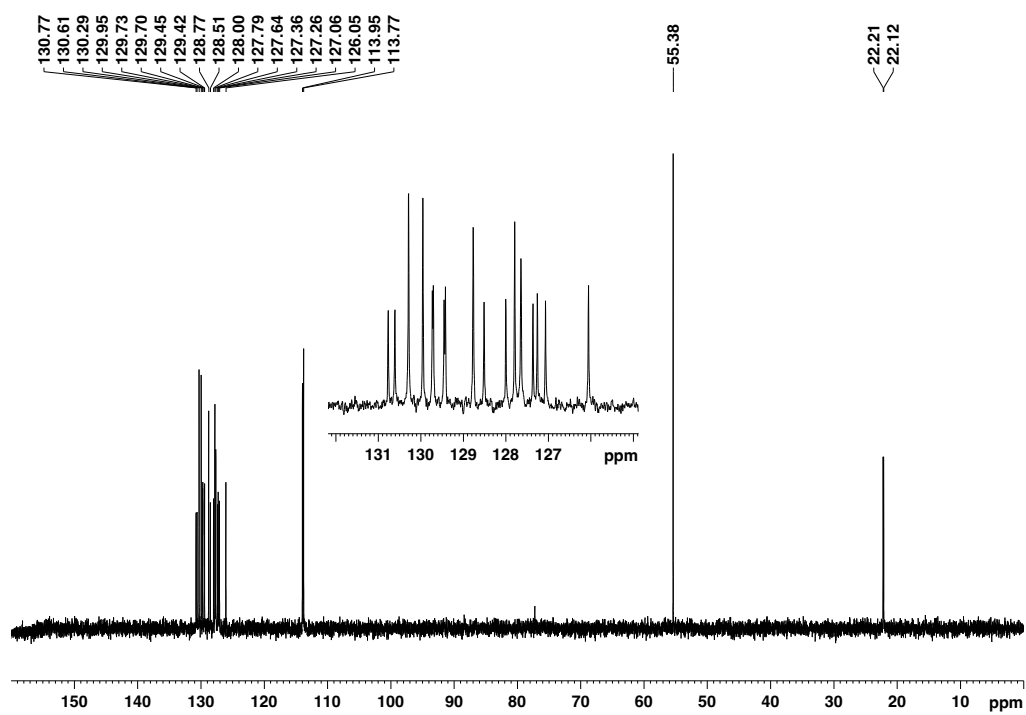

### 5-Ethanoyl-10-(4-chlorophenyl)-5H-dibenzo[*b,f*]azepine (10c)

Isomeric ratio = 56/44

$^1\text{H}$  NMR (400 MHz,  $\text{CDCl}_3$ )

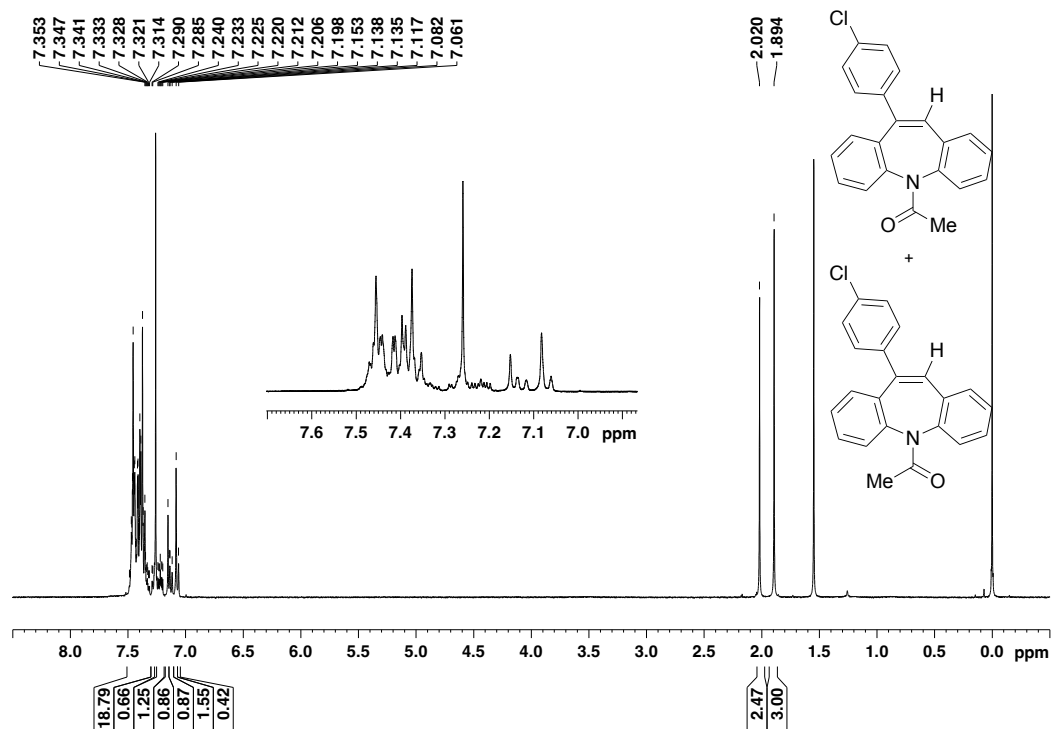

$^{13}\text{C}\{^1\text{H}\}$  NMR (100 MHz,  $\text{CDCl}_3$ )

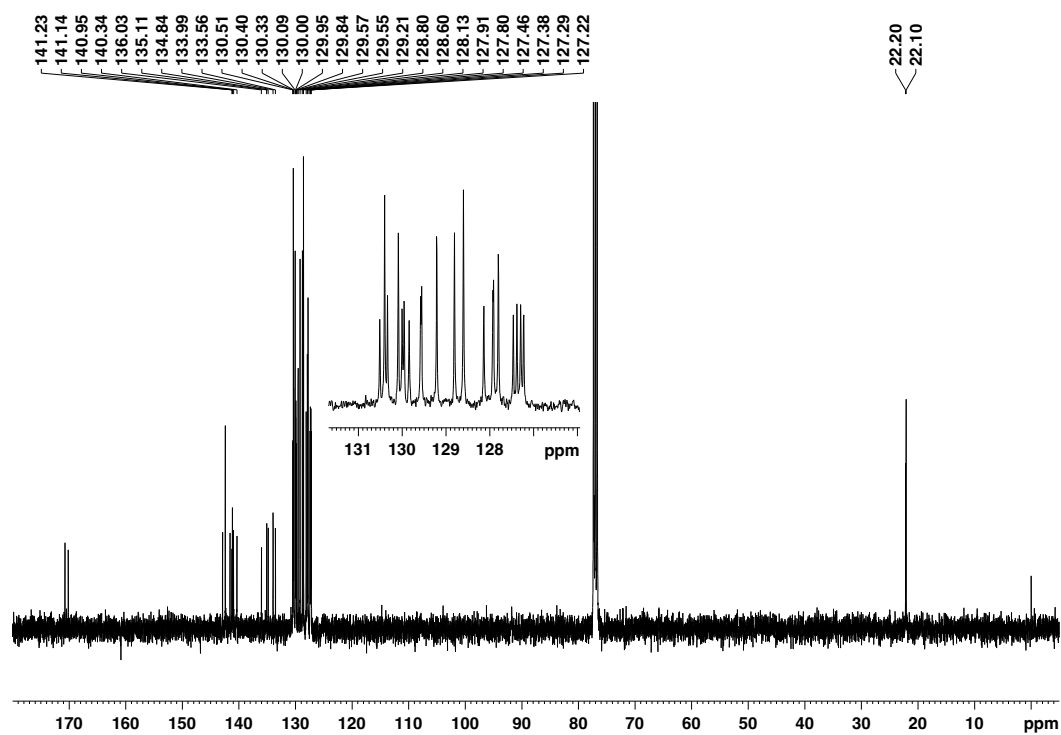

DEPT NMR (100 MHz, CDCl<sub>3</sub>)

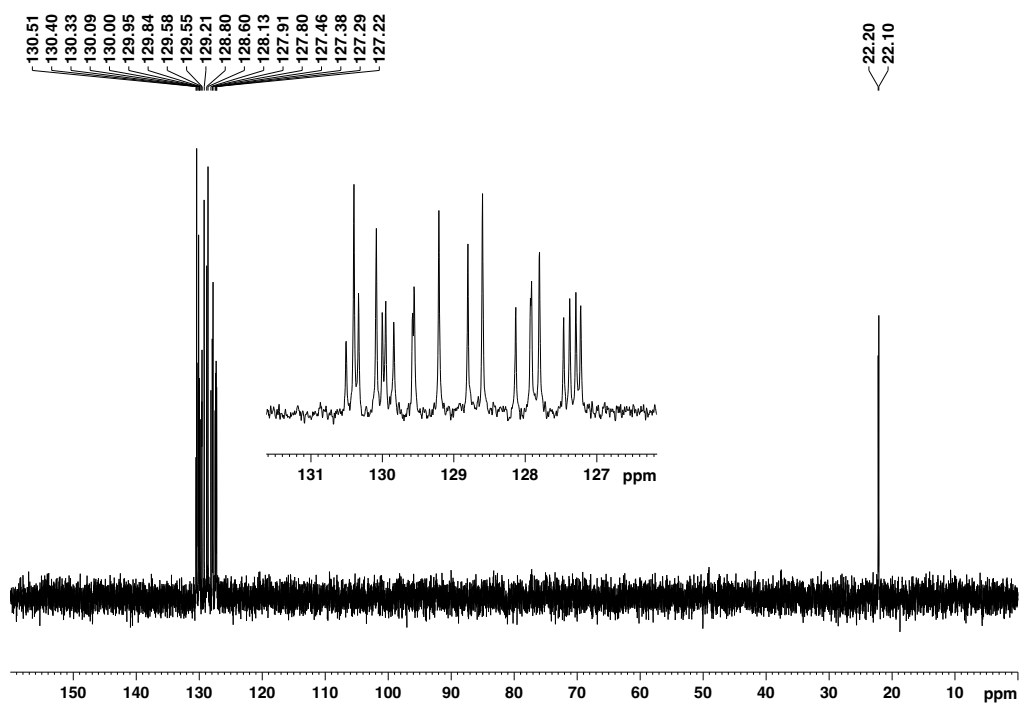

### 5-Ethanoyl-10-(4-methoxycarbonylphenyl)-5H-dibenzo[*b,f*]azepine (10d)

Isomeric ratio = 52/48

$^1\text{H}$  NMR (400 MHz,  $\text{CDCl}_3$ )

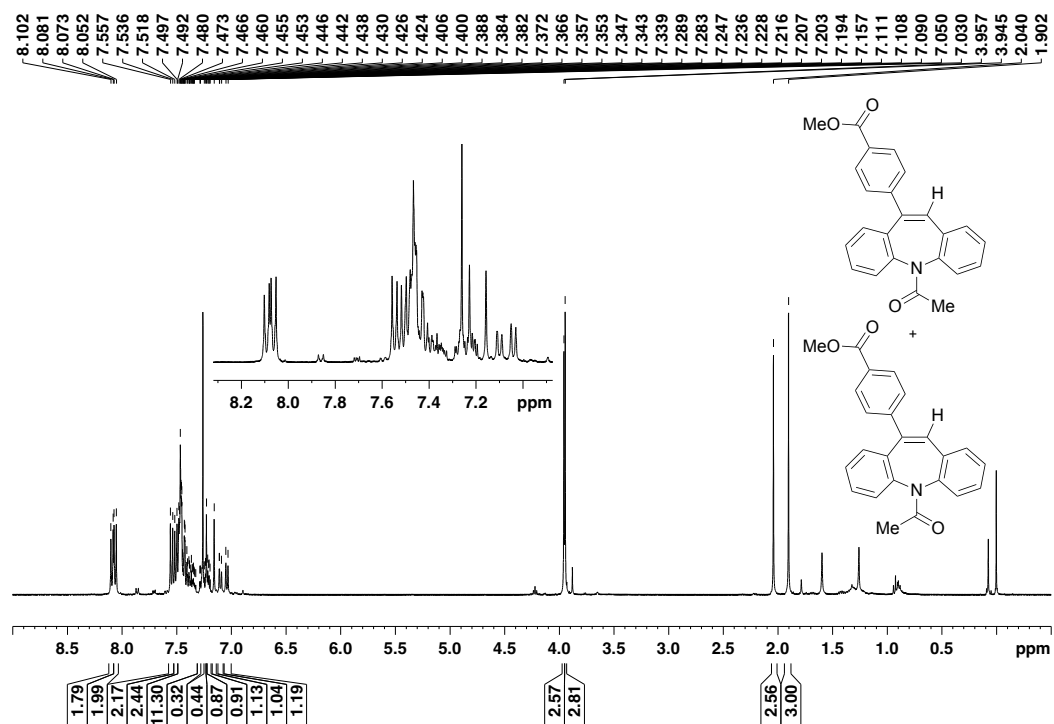

$^{13}\text{C}\{^1\text{H}\}$  NMR (100 MHz,  $\text{CDCl}_3$ )

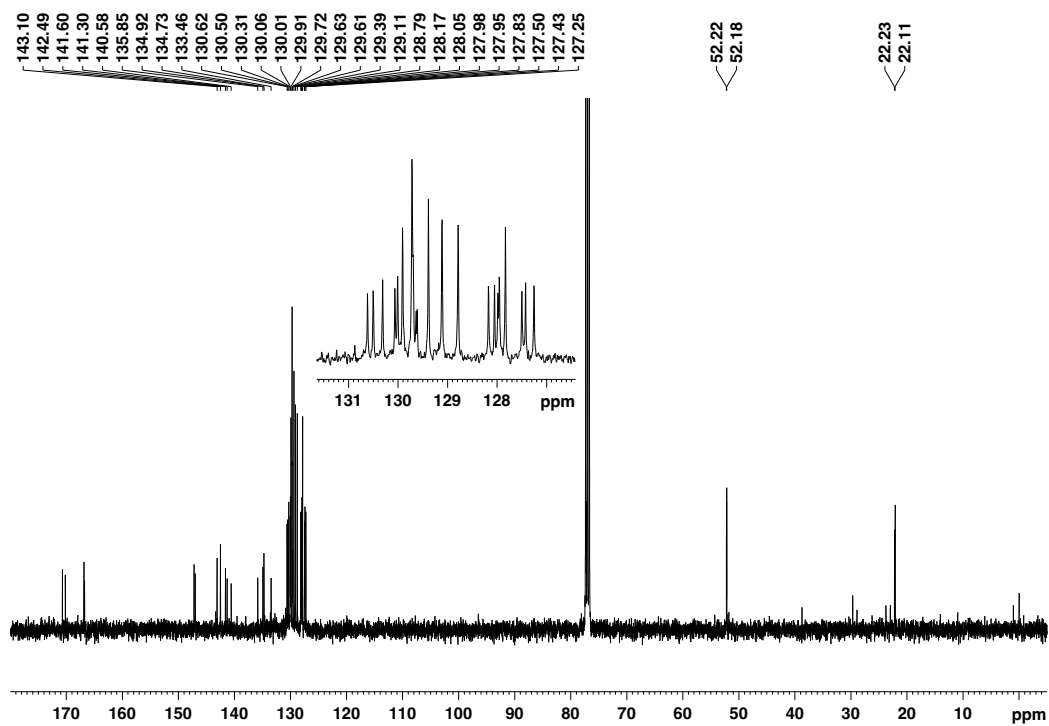

DEPT NMR (100 MHz, CDCl<sub>3</sub>)

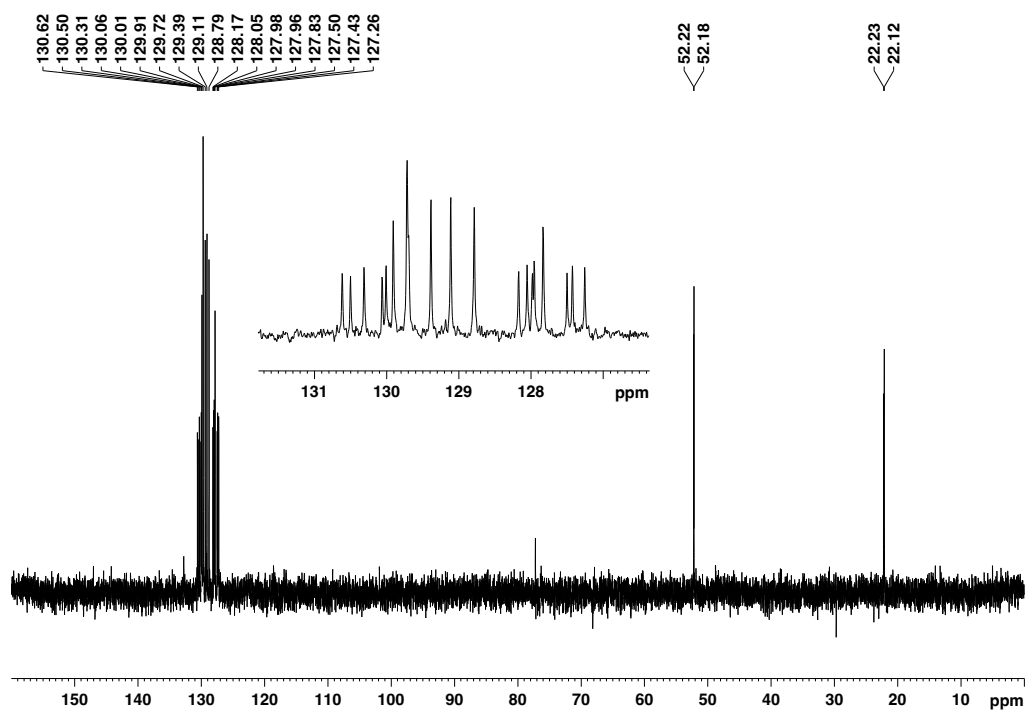



### 5-Ethanoyl-2-fluoro-11-(4-methylphenyl)-5*H*-dibenzo[*b,f*]azepine (10e)

Isomeric ratio = 56/44

$^1\text{H}$  NMR (400 MHz,  $\text{CDCl}_3$ )

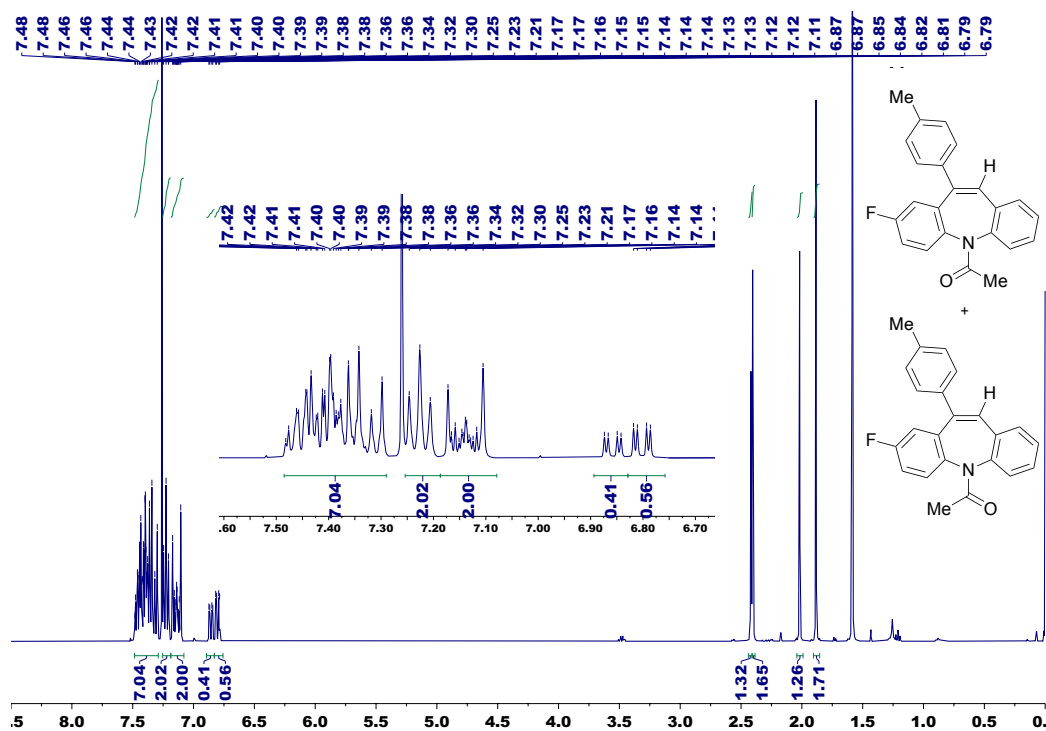

$^{13}\text{C}\{^1\text{H}\}$  NMR (100 MHz,  $\text{CDCl}_3$ )

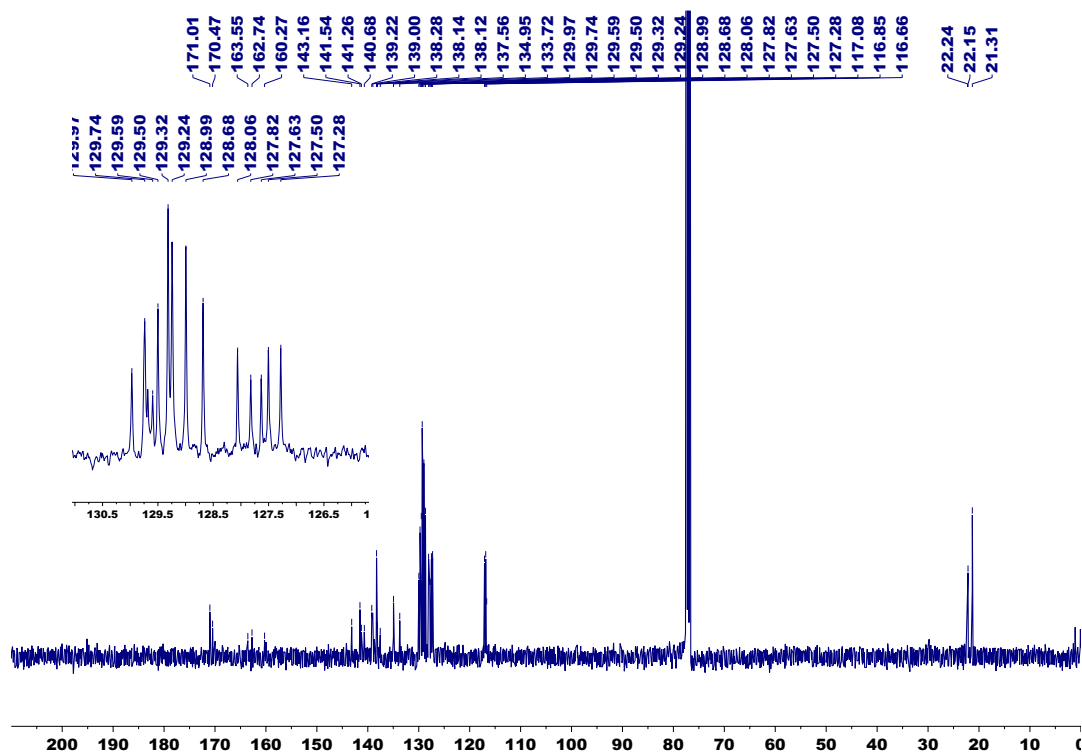

DEPT NMR (100 MHz, CDCl<sub>3</sub>)

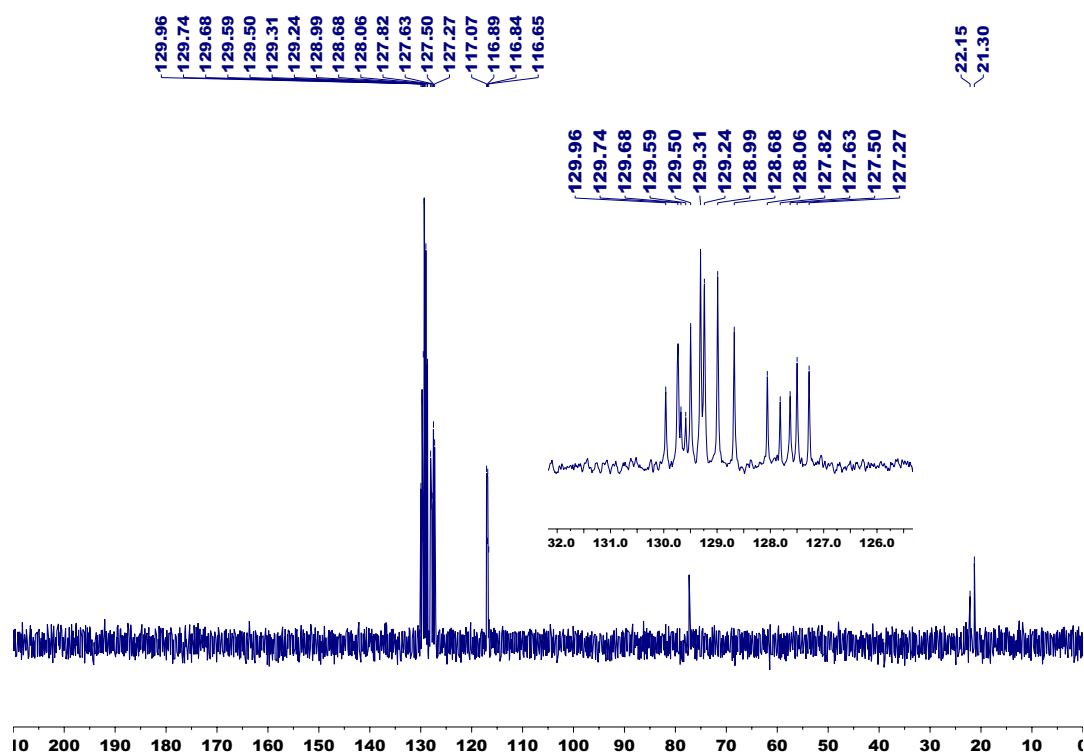

<sup>19</sup>F NMR (376.5 MHz, CDCl<sub>3</sub>)

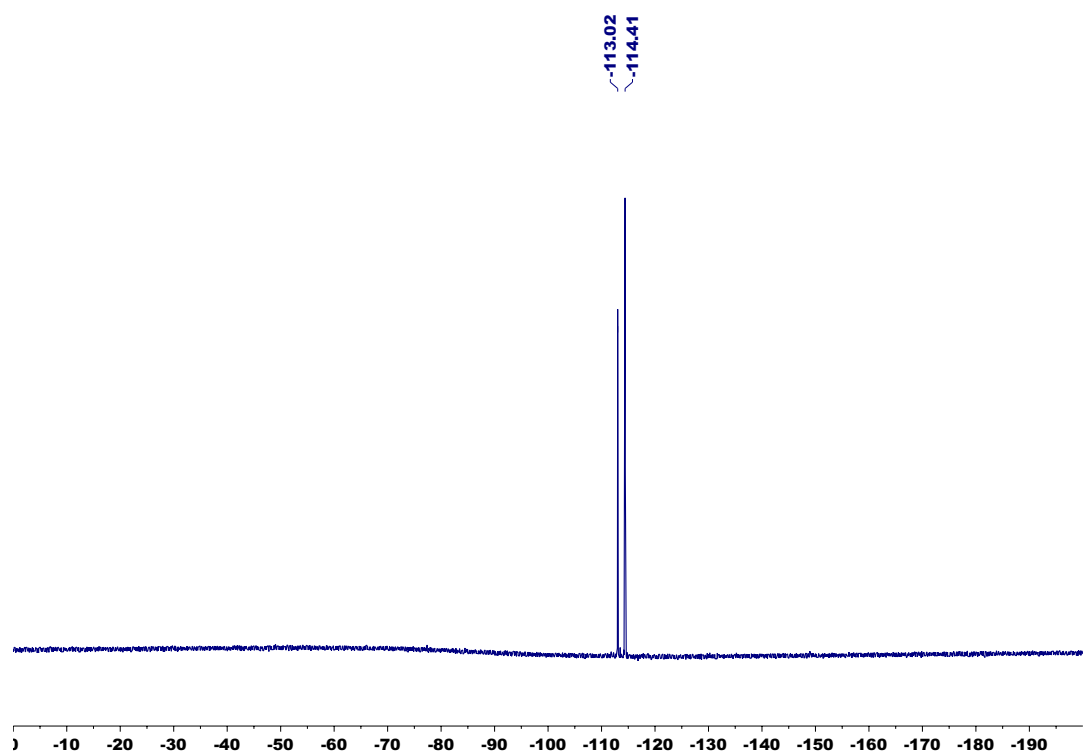

Supplement: d2ob00950a1.pdf [file d2ob00950a1.pdf]
